1 Title

2 'Leading from the front' implementation strategies increase the success of influenza vaccination  
3 drives among healthcare workers: A reanalysis of Systematic Review evidence using Intervention  
4 Component Analysis (ICA) and Qualitative Comparative Analysis (QCA)

5 Short title

6 Implementation features of successful influenza vaccine drives for healthcare workers

7 Authors

8 Dr Katy Sutcliffe, Dr Dylan Kneale and Professor James Thomas

9 Affiliations

10 EPPI-Centre, Social Research Institute, UCL Institute of Education, University College London

11 Corresponding author

12 Dr Katy Sutcliffe

13 katy.sutcliffe@ucl.ac.uk

## 14 Abstract

### 15 Background:

16 Seasonal influenza vaccination of healthcare workers (HCW) is widely recommended to protect staff  
17 and patients. A previous systematic review examined interventions to encourage uptake finding that  
18 hard mandates, such as loss of employment for non-vaccination, were more effective than soft  
19 mandates, such as signing a declination form, or other interventions such as incentives. Despite these  
20 overarching patterns the authors of the review concluded that ‘substantial heterogeneity’ remained  
21 requiring further analysis. This paper reanalyses the evidence using Intervention Component Analysis  
22 (ICA) and Qualitative Comparative Analysis (QCA) to examine whether the strategies used to  
23 implement interventions explain the residual heterogeneity.

### 24 Methods:

25 We used ICA to extract implementation features and trialist’s reflections on what underpinned the  
26 success of the intervention they evaluated. The ICA findings then informed and structured two QCA  
27 analyses to systematically analyse associations between implementation features and intervention  
28 outcomes. Analysis 1 examined hard mandate studies. Analysis 2 examined soft mandates and other  
29 interventions.

### 30 Results:

31 In Analysis 1 ICA revealed the significance of ‘leading from the front’ rather than ‘top-down’  
32 implementation of hard mandates. Four key features underpinned this: providing education prior to  
33 implementation; two-way engagement so HCW can voice concerns prior to implementation; previous  
34 use of other strategies so that institutions ‘don’t-go-in-cold’ with hard-mandates; and support from  
35 institutional leadership. QCA revealed that either of two configurations were associated with greater  
36 success of hard mandates. The first involves two-way engagement, leadership support and a ‘don’t-

37 go-in-cold' approach. The second involves leadership support, education and a 'don't-go-in-cold'  
38 approach. Reapplying the 'leading from the front' theory in Analysis 2 revealed similar patterns.

### 39 Conclusions:

40 Regardless of intervention type a 'leading from the front' approach to implementation will likely  
41 enhance intervention success. While the results pertain to flu vaccination among HCWs, the  
42 components identified here may be relevant to public health campaigns regarding COVID-19  
43 vaccination.

44

## 45 Introduction

46 Seasonal influenza can have dire consequences for individuals, particularly for vulnerable groups such  
47 as children, older people and those with pre-existing health problems [1]. Outbreaks can also place  
48 significant strain on health services. This can result from both an increased number of patients, and  
49 from a reduced number of available healthcare workers (HCW) as their role puts them at high risk of  
50 infection due to close contact with the virus [2]. In order to protect themselves and their patients  
51 HCWs involved in direct patient care are encouraged to receive an influenza vaccine [3]. Whilst  
52 evidence shows influenza vaccine to be safe, effective, and to decrease mortality in patients [4] a key  
53 challenge is poor vaccine uptake. In the 2018-2019 season in England 70% of frontline HCWs were  
54 vaccinated, which represents a year-on-year increase, but is short of the national target of 75% [3].  
55 Vaccine hesitancy has been increasing in recent years [5, 6] and the COVID-19 pandemic has  
56 highlighted the urgency of understanding how to address it [7], particularly among HCWs to ensure  
57 their wellbeing as well as to ensure the delivery of safe, efficient and effective healthcare services [8].

58 A comprehensive systematic review [9], which was recently updated [10], found that various  
59 interventions to encourage uptake can increase rates of vaccination among HCW. The review  
60 examined both voluntary programmes (such as incentives, media campaigns or education  
61 programmes) and policies which make vaccination mandatory for HCWs. Meta-analysis was used to  
62 quantify the effects of the various approaches in the original review. The findings demonstrated that  
63 among the intervention strategies examined, 'hard' mandates such as loss of employment for non-  
64 vaccination were by far the most effective ( $RR_{unvac}$  (risk ratio of being unvaccinated) = 0.18, 95% CI:  
65 0.08–0.45). This was followed by 'soft' mandates such as requiring staff to sign a declination form,  
66 increasing access (i.e. making it easier for staff to receive the vaccination) ( $RR_{unvac}$  = 0.64, 95% CI:  
67 0.45–0.92) and increasing awareness (e.g. through media campaigns) ( $RR_{unvac}$  = 0.83, 95% CI: 0.71–  
68 0.97). The pooled findings for incentives did not quite reach statistical significance ( $RR_{unvac}$  = 0.89, 95%

69 CI: 0.77–1.03) and pooled findings for educational interventions showed no evidence of an effect  
70 ( $RR_{unvac} = 0.96$ , 95% CI: 0.84–1.10).

71 Whilst these pooled findings about the pooled effects of interventions within broad categories is a  
72 useful step in understanding how best to address the issue of vaccination uptake in HCW, vital  
73 knowledge about exactly what to implement and how is lacking. The authors identified ‘substantial  
74 heterogeneity’ in the findings ([9] p.66) and acknowledged that this may be due to a number of  
75 factors including: the HCW populations studied; the clinical setting; the country; the specific  
76 components of each intervention and the way these were implemented in each study. For example,  
77 the exact nature of ‘hard-mandates’ varied considerably; some required mask use for unvaccinated  
78 HCW whilst others prohibited patient contact and yet others resulted in termination of employment.  
79 Uptake of the review findings may therefore be hindered by a lack of information about the specific  
80 features and implementation methods of successful strategies [11, 12]. In addition, ethical concerns  
81 about the use of hard mandates suggest a more holistic understanding of such strategies is warranted  
82 [13]. The aim of this project was to reanalyse the trials using an alternative analytical technique –  
83 qualitative comparative analysis (QCA). QCA – originally developed in political science [14] – has  
84 recently been employed in systematic reviews [15, 16]. The technique seeks to uncover the causal  
85 mechanisms and key features of an intervention. QCA is a ‘case’ rather than a ‘variable’ oriented  
86 approach. A ‘case’ in QCA essentially refers to a study - both its features and the context in which it  
87 was implemented. And the ‘case’ oriented approach requires a deep and holistic understanding of  
88 each case. Another key feature of QCA is that it uses set theory. QCA makes systematic comparisons  
89 between cases based on their outcomes – i.e. comparing the characteristics of a set (i.e. a group) of  
90 effective interventions to those of a set of ineffective interventions. QCA seeks to identify the degree  
91 of overlap between these outcome sets and sets of interventions with similar characteristics. This  
92 approach enables an analysis that, unlike statistical approaches, can operate with relatively small  
93 numbers of studies and a large number of variables (which are referred to as ‘conditions’ in QCA).

94 Lastly QCA is an abductive approach. Unlike the deductive approach of meta-analysis in which a  
95 hypothesis is posed and then tested, the abductive approach involves starting with an observed  
96 outcome (in this case rates of vaccination uptake) and working backwards to identify the simplest and  
97 most likely explanation for the observed outcome. Because the abductive approach yields a plausible  
98 explanation but is not able to conclusively verify it, it is far less secure than a deductive approach. As  
99 such a key requirement is that the analysis is underpinned by theory.

100 The high-level findings of the Lytras et al. review about the success of hard-mandates suggest the  
101 validity of a 'sticks are better than carrots' intervention theory. However, since not all hard-mandate  
102 (or soft-mandate) interventions achieved similar rates of success we needed to look beyond the overt  
103 intervention theory and to focus on 'on-the-ground' implementation and context. Intervention  
104 Component Analysis (ICA) is a methodological approach which seeks to 'bridge the gap' between  
105 evidence of intervention effectiveness and practical implementation of interventions [17]. More  
106 specifically, ICA seeks to generate an 'experienced-based' understanding of intervention mechanisms  
107 by tapping into trialist's informal reflections about how the interventions they evaluated worked 'on  
108 the ground'. ICA uses qualitative data analysis techniques and draws on informal evidence – often  
109 reported in the discussion section of published trial reports – about what trialists' felt to led to the  
110 success of an intervention or what inhibited its success. Of course, there are potential limitations to  
111 drawing on informal data of this kind. However, ICA offers a systematic process through which  
112 experience-based theoretical explanations of intervention mechanisms can be developed, and which  
113 can then be tested using more formal analytical techniques such as QCA. In addition, given that (too)  
114 many outcome evaluations fail to be accompanied by a process evaluation, which could provide richer  
115 data on intervention mechanisms and fidelity to intervention protocols, ICA provides a framework for  
116 incorporating additional data on intervention processes and components. ICA and QCA were paired in  
117 a previous project to successfully identify critical intervention mechanisms [18].

118 The overarching aim of this research was to support hospitals to implement effective vaccination  
119 uptake strategies by identifying the critical features and implementation methods of successful  
120 strategies. In addition, by exploring how vaccination uptake strategies work, we hoped to provide  
121 some insights that might assist with global drives to vaccinate against COVID-19.

## 122 [Materials and methods](#)

123 The research involved a reanalysis of the trials included in the Lytras et al. 2016 review [9] and from  
124 the Lorenc et al. 2018 update [10]. Ethical approval was not obtained since the analysis involved only  
125 published data already in the public domain. There are no reporting guidelines for reanalyses of  
126 systematic reviews, although guidance for QCA studies is being developed [19] and we have sought to  
127 provide a detailed and transparent account of the work such that it could be replicated.

128 Our initial hypothesis was that the mechanisms differentiating the more successful from the less  
129 successful hard-mandate interventions would differ from the mechanisms differentiating the more  
130 successful of the soft-mandate and other interventions from those that were less successful. Thus, we  
131 conducted two separate analyses. Analysis 1 explored which intervention and implementation  
132 features were associated with greater effectiveness among the hard-mandate interventions, and  
133 Analysis 2 explored which features were associated with greater effectiveness among the soft-  
134 mandate and other interventions. We completed all of the QCA stages for Analysis 1 before repeating  
135 the process for Analysis 2.

### 136 [QCA stage 0: Selection of cases and determining outcome sets](#)

137 For Analysis 1 we selected all eight of the hard mandate cases [20-26] included in the original review  
138 [9] (note: two hard mandate cases were evaluated in the Ksienski 2014 study), and the three  
139 additional hard mandate cases [27-29] identified in the update [10]. For Analysis 2 there was a much  
140 greater number of non-hard mandate cases (45 cases from the review and 12 from the update) so we  
141 were able to purposively select the cases with maximum variation in outcomes, i.e. the 10 most

142 effective non-hard mandate cases [30-37] and the 10 least effective ones [38-44]. (Note: A total of six  
143 papers reported the 10 least effective soft mandate / other cases; two cases were reported in each of  
144 the following three papers Dey et al. 2001, Doratotaj et al. 2008 and Zimmerman et al. 2009.) By  
145 excluding the moderately effective non-hard mandate cases we filtered out 'noise' which might  
146 obscure differences between the most effective and least effective. Effectiveness was determined as  
147 per the original Lytras review in terms of the Relative Risk of remaining unvaccinated after the  
148 intervention ( $RR_{unvac}$ ); values of  $RR_{unvac} < 1$  suggest that the intervention is effective in reducing the  
149 number of unvaccinated HCWs. For Analysis 2 we used crisp outcome sets, in which cases are full  
150 members of a set of 'most effective' cases or full members of a set of 'least effective cases'. We  
151 ranked the cases according to their  $RR_{unvac}$  value; the 10 in the most effective set had values ranging  
152 from 0.06 to 0.59, the 10 in the least effective set had values ranging from 0.95 to 0.99. Since we  
153 included the full range of outcomes for Analysis 1 (i.e. we did not exclude moderately effective cases  
154 as we did for Analysis 2) we created fuzzy outcome sets, where studies could be partial members of  
155 sets. A fully successful outcome set (coded as 1) comprised of four cases with  $RR_{unvac}$  values between  
156 0.01 and 0.14. A mostly successful outcome set (coded as 0.66) comprised of four cases with  $RR_{unvac}$   
157 values between 0.15 and 0.29. A mostly unsuccessful outcome set (coded as 0.33) comprised of two  
158 cases with  $RR_{unvac}$  values between 0.30 and the least effective in the set (0.57).

### 159 QCA stage 1: Identification of conditions using ICA and building the data table

160 Once we had selected our cases and determined our outcome sets we read and re-read the papers  
161 reporting the 11 hard-mandate cases to generate a deep knowledge for Analysis 1. After the  
162 familiarisation exercise two authors (KS and DK) independently extracted information about the  
163 nature of the hard-mandate interventions to create a data table with cases represented in rows and  
164 conditions represented in columns (see supporting information). Initial work focused on the  
165 intervention descriptions as provided by the authors – for example we captured data on the nature of  
166 hard mandates such as whether it resulted in loss of employment or not, whether there were  
167 stigmatising markers of non-identification and whether any 'declination' procedures were particularly



168 onerous or not. However, limiting our data collection to the intervention descriptions alone proved  
169 unfruitful for identifying features that distinguished between the most and least successful  
170 interventions. Thus, we decided to focus on implementation and to employ ICA to extract information  
171 from the discussion section. Specifically, we used inductive qualitative analysis techniques to code  
172 authors' perceptions about the factors that acted as facilitators of or barriers to success. ICA revealed  
173 four implementation features that were commonly described by authors as underpinning the success  
174 of hard mandate interventions: **Education** (reported in 5 cases) for example providing information  
175 sessions prior to mandate implementation; **two-way engagement** (reported in 2 cases) i.e.  
176 opportunities for HCW to raise concerns; **'don't go in cold'** (reported in 5 cases) i.e. efforts in previous  
177 years to encourage vaccination uptake; and **leadership support** (reported in 6 cases) i.e. involvement  
178 and endorsement from senior leaders in the institution. Box 1, below provides example statements  
179 from authors regarding the importance of these implementation features. Before proceeding to the  
180 next stages of QCA analysis the quality of the data was evaluated, including checks for 'collinearity' of  
181 conditions and rarity of conditions.

182 **Box 1: Example author statements about factors perceived as vital to successful hard-mandate**  
183 **implementation**

**Education:** *"Key factors that supported the success of the program included consistent communication emphasizing patient safety and quality of care."* (Babcock et al. 2010)

**Two-way engagement:** *"Continued stakeholder engagement is required to ensure that the decision-making process is collaborative and the Policy is not viewed as punitive."* (Ksienski 2014)

**Don't go in cold:** *"Sequential expansion of the program over several years was a key element to the success."* (Frenzel et al. 2016)

**Leadership support:** *"Without a strong endorsement from the CEO, president, and governing board, it is unlikely that the program would have been successful."* (Rakita et al. 2010)

184

185 We returned to the theoretical literature to see if existing theories reflecting our emergent findings  
186 could help to consolidate our thinking. This process identified the theoretical concept of ‘leading from  
187 the front’ as opposed to a ‘top-down’ or ‘authoritarian’ approach to leadership with the key  
188 underpinning principle being that organisations should aim to ‘bring people with you’. The concept  
189 draws on literature on transformational leadership which emphasises communication, listening,  
190 modelling and leadership commitment [45].

191 The same steps were taken for Analysis 2; however as we had assumed a different mechanism would  
192 underpin the non-hard mandate studies we did not initially extract the same conditions as identified  
193 in the ICA for Analysis 1. Initial work for Analysis 2 was based on a ‘dark logic’ approach [46]. Since the  
194 non-hard mandate interventions were found to be broadly less effective than hard-mandate  
195 interventions we considered whether we might identify harmful or ineffective mechanisms that  
196 undermined the approach. However, this analytical plan proved unfruitful. So we decided to see if the  
197 same conditions and the ‘leading from the front’ theory might also explain the variation in outcomes  
198 among the soft-mandate and other interventions.

### 199 QCA stage 2: Constructing Truth Tables

200 In QCA stage 2 a Truth table, the key analytic device of QCA, is created. The Truth Table moves the  
201 focus from individual cases to groups of cases sharing the same outcomes ‘outcome sets’ (as  
202 described above) and from individual conditions to sets of studies with particular combinations or  
203 “configurations” of conditions. The Truth Tables for analyses 1 (Table 1) and 2 (Table 3) are presented  
204 below.

### 205 QCA stage 3: Checking the quality of the Truth Tables

206 The first check of each Truth Table involved assessing the degree to which a consistent pattern of  
207 association between the configurations and the outcome sets is evident. For example, if all cases  
208 involving all four conditions in the theory (education, two-way engagement, a ‘don’t go in cold’  
209 approach and leadership support) are also all cases that are fully part of the successful outcome set

210 and none are cases in the unsuccessful outcome set, that would show a perfect consistency score,  
211 indicated with a '1', for that row of the Truth Table. Conversely, if all cases in which none of the four  
212 conditions were present were also all cases in the unsuccessful outcome set, this would also show  
213 perfect consistency and be indicated by a '0'. Some level of inconsistency is permitted and even  
214 expected with fuzzy-set QCA – but patterns of association should be evident, and inconsistency  
215 explored for potential deviant cases; for crisp-set QCA, inconsistency is not expected and needs to be  
216 resolved or explained. The second check we performed was to assess coverage, i.e. whether  
217 configurations are supported by multiple cases. It is expected that there will be several paths to a  
218 given outcome, and so the coverage offered by any given configuration may only be one or a small  
219 number of cases. However, where multiple cases support a configuration - it helps us to understand  
220 the relevance or importance of different configurations, and reduces the possibility that the resulting  
221 QCA solution becomes an explanation of individual cases. A third check examined whether there was  
222 a reasonable spread of cases across the 16 possible configurations in each of our truth tables. Having  
223 evidence for a range of possible configurations helps us to interpret and refine our causal theory.  
224 Final checks included (i) examining for deviant cases consistency [47] - those cases with values above  
225 0.5 for the condition configuration and below 0.5 for the outcome (inconsistencies); and (ii)  
226 examination of counterintuitive findings – e.g. if cases with all conditions specified in our underlying  
227 theory were associated with unsuccessful outcomes – indicating that our theory does not play out in  
228 practice. As the Truth Tables below illustrate, we found satisfactory results for each of the above  
229 checks.

#### 230 QCA stage 4: Boolean minimization to identify the simplest expression of configurations

231 We used Boolean minimisation to identify simplified configurations with coverage of as many of the  
232 cases in the successful outcome set as possible and with high consistency, generating what is known  
233 in QCA parlance as a 'complex solution'.

## 234 QCA stage 5: Consideration of “logical remainders”

235 In this stage possible configurations for which no cases are available (known as logical remainders) are  
236 used to assist with producing a simplified QCA solution. Software was used to impute outcomes for  
237 logical remainders, and this information was accounted for in the QCA solutions, initially generating  
238 what was known as a parsimonious solution. The ‘parsimonious solution’ involves the use of an  
239 algorithm to impute the likely outcome that would have occurred had the logical remainder been  
240 observed. However, in obtaining this solution, some untenable assumptions may have been made in  
241 the interest of parsimony, and we generated a further ‘intermediate solution’ that incorporated our  
242 own assumptions about the impact of different components (all assumed to be positive in generating  
243 a successful outcome). Furthermore, we implemented an algorithm developed by Duşa (2018) to  
244 remove untenable and contradictory logical remainders that could be otherwise be used to generate  
245 the solution, generating an ‘enhanced intermediate solution’. This solution represented our preferred  
246 solution, and is the basis of our interpretation in the results.

## 247 QCA stage 6: Interpreting the solutions

248 Once we had our QCA solutions we returned to our cases and theory to check that the solutions made  
249 sense in the context of individual cases and across cases as a general explanation.

## 250 Results

### 251 Hard mandate studies

252 QCA revealed that the ‘leading from the front’ theory appeared to explain why some hard-mandate  
253 interventions were more successful than others. As the Truth Table (Table 1) below, based on fuzzy-  
254 set data, illustrates we had cases for five of the 16 possible configurations. The table illustrates that  
255 there is perfect consistency in the relationship between the configuration with all four conditions and  
256 cases with the highest levels of vaccine uptake (top row). There is also perfect consistency between  
257 higher rates of vaccine uptake and the configuration in which education was absent from the  
258 intervention, but the other three conditions were present – although there was only one case with

259 this configuration (second row). The table shows high consistency (0.855) with successful outcomes  
 260 for the configuration with no two-way engagement but the other three conditions present (row 3, 2  
 261 cases). The final two rows illustrate the relationship between configurations associated with  
 262 unsuccessful outcomes. A configuration in which no intervention components of interest were  
 263 present, was found in three cases deemed to be mainly unsuccessful and one partially successful  
 264 case, while a configuration with two components was found in one mainly unsuccessful case. We also  
 265 emphasise that all the studies achieved statistically significant reductions in the risk of HCWs  
 266 remaining unvaccinated, and the language of ‘successful’ and ‘unsuccessful’ is relative rather than  
 267 absolute in this set of results.

268 **Table 1: Truth Table for Hard Mandate QCA (n=11 cases)**

| Two-way engagement<br>(TWOWAYENG) | Strong Leadership | Support<br>Education Component | (EDUC) | Don't go in cold<br>(DONTGOCOLD) | Outcome | Number of<br>Studies | Consistency | PRI   | Cases                                                            |
|-----------------------------------|-------------------|--------------------------------|--------|----------------------------------|---------|----------------------|-------------|-------|------------------------------------------------------------------|
| 1                                 | 1                 | 1                              | 1      | 1                                | 1       | 3                    | 1           | 1     | Babcock, Rakita, smith                                           |
| 1                                 | 1                 | 0                              | 1      | 1                                | 1       | 1                    | 1           | 1     | Stuart                                                           |
| 0                                 | 1                 | 1                              | 1      | 1                                | 1       | 2                    | 0.855       | 0.795 | Drees, Frenzel                                                   |
| 0                                 | 0                 | 0                              | 0      | 0                                | 0       | 4                    | 0.45        | 0.137 | Awali, Ksienski A<br>(Hospital), Ksienski B<br>(ResiCare), Leibu |
| 0                                 | 1                 | 0                              | 1      | 0                                | 0       | 1                    | 0.33        | 0.00  | Podscervinski                                                    |

269 Notes: PRI: Proportional Reduction in Inconsistency – a measure of how well a configuration distinguishes between the  
 270 outcome and its negation

271 Boolean minimisation, and the generation of an enhanced intermediate solution identified two  
 272 simplified pathways of hard mandate implementation that lead to greater vaccination uptake as  
 273 illustrated in Table 2 below. The first involves two-way engagement, leadership support and a ‘don’t-

274 go-in-cold' approach. The second involves leadership support, education and a 'don't-go-in-cold'  
 275 approach. Therefore, an intervention containing either configuration of components and processes is  
 276 sufficient to result in a successful outcome. Both configurations cover the majority of instances of the  
 277 outcome, and crucially they contain all the studies identified as full members of the 'successful'  
 278 outcome set.

279 **Table 2: Minimised intermediate solution for hard mandate QCA**

|                                                                                 |                                  | Consisten<br>cy | PRI   | Raw<br>Coverage | Unique<br>Coverage | cases                                        |
|---------------------------------------------------------------------------------|----------------------------------|-----------------|-------|-----------------|--------------------|----------------------------------------------|
| <b>1</b>                                                                        | TWOWAYENG*LEADSUP<br>*DONTGOCOLD | 1               | 1     | 0.408           | 0.137              | Stuart;<br>Babcock,<br>Rakita, Smith         |
| <b>2</b>                                                                        | LEADSUP *EDUC<br>*DONTGOCOLD     | 0.915           | 0.897 | 0.499           | 0.227              | Drees, Frenzel;<br>Babcock,<br>Rakita, Smith |
| <b>M</b><br><b>1</b>                                                            |                                  | 0.932           | 0.921 | 0.636           |                    |                                              |
| <b>TWOWAYENGAGE*LEADSUP *DONTGOCOLD + LEADSUP*EDUC*DONTGOCOLD =&gt; SUCCESS</b> |                                  |                 |       |                 |                    |                                              |

280 Notes: See Table 1 for condition names; Upper case conditions indicate the condition is present and lower case indicate a  
 281 condition is absent; \* = 'AND' relationship; + = 'OR' relationship; Raw coverage: share of outcome covered by a  
 282 configuration; Unique coverage: share of outcome uniquely coverage by a configuration

283 [Soft mandate / other studies \(n=20 cases\)](#)

284 The Truth Table below (Table 3) presents configurations using the same four conditions as specified in  
 285 the 'leading from the front' theory, plus an additional condition 'letter only'. When we first assessed  
 286 the 20 soft mandate / other cases we had trouble understanding why some highly effective studies  
 287 did not fit with the theory. It is possible that there are other conditions or contextual factors that  
 288 explain their success. However, we noticed that these particular studies contained scant information  
 289 as they were not full research papers but letters only; in particular, they had limited discussion

290 sections which is where critical information, for example about the influence of strong leadership  
 291 support, was generally reported. Thus, we made the assumption that some of the critical features in  
 292 the theory were present in these cases but just not described due to the type of article. Once we  
 293 coded cases as ‘letter only’ (or research articles) and included this in the model, the same patterns  
 294 began to emerge.

295 For example, the Truth Table makes clear that all but one of the configurations associated with least  
 296 effectiveness – in the six bottom rows - did not involve strong leadership support. In contrast, all  
 297 cases associated with greater effectiveness (aside from two which were letters only) did involve  
 298 leadership support. Similarly, all cases bar one identified as having a successful outcome had evidence  
 299 of activities being implemented before the intervention; the one case that did not was a letter.

300 Table 3: Truth Table for Soft Mandate / Other QCA (n=20 cases)

| Strong Leadership Support | Don't go in cold | Two-way engagement | Education Component | Letter only available | Outcome | Number of Studies | Consistency | PRI | Cases                              |
|---------------------------|------------------|--------------------|---------------------|-----------------------|---------|-------------------|-------------|-----|------------------------------------|
| 1                         | 1                | 1                  | 1                   | 0                     | 1       | 4                 | 1           | 1   | Thomas, Lavela, Heinrich, LeMaitre |
| 0                         | 0                | 0                  | 1                   | 1                     | 1       | 1                 | 1           | 1   | Shannon                            |
| 0                         | 1                | 1                  | 1                   | 1                     | 1       | 1                 | 1           | 1   | Sadlier                            |
| 1                         | 1                | 0                  | 1                   | 0                     | 1       | 1                 | 1           | 1   | Ribner                             |
| 1                         | 1                | 0                  | 1                   | 1                     | 1       | 1                 | 1           | 1   | Lopes                              |
| 1                         | 1                | 1                  | 0                   | 0                     | 1       | 1                 | 1           | 1   | Honda                              |
| 1                         | 1                | 1                  | 1                   | 1                     | 1       | 1                 | 1           | 1   | Guanche Garcel                     |

|   |   |   |   |   |   |   |   |   |                                                                                                |
|---|---|---|---|---|---|---|---|---|------------------------------------------------------------------------------------------------|
| 0 | 1 | 0 | 1 | 0 | 0 | 4 | 0 | 0 | Doratoraj a (letter), Camarago,<br>Zimmerman a (incentives),<br>Zimmerman b (increased access) |
| 0 | 0 | 1 | 1 | 0 | 0 | 2 | 0 | 0 | Dey a, Dey b                                                                                   |
| 0 | 0 | 0 | 1 | 0 | 0 | 1 | 0 | 0 | Leitmeyer                                                                                      |
| 0 | 1 | 0 | 0 | 0 | 0 | 1 | 0 | 0 | Doratoraj b (raffle)                                                                           |
| 0 | 1 | 1 | 1 | 0 | 0 | 1 | 0 | 0 | Smedley                                                                                        |
| 1 | 0 | 0 | 1 | 0 | 0 | 1 | 0 | 0 | Rothan-Tondeur (educ only)                                                                     |

301 Notes: PRI: Proportional Reduction in Inconsistency – a measure of how well a configuration distinguishes between the  
302 outcome and its negation

303 **Table 4: Minimised intermediate solution for soft mandate / other QCA**

|                                                                                                                   |                                         | Consis<br>tency | PRI | Raw<br>Cover<br>age | Uniqu<br>e<br>Cover<br>age | cases                                                                   |
|-------------------------------------------------------------------------------------------------------------------|-----------------------------------------|-----------------|-----|---------------------|----------------------------|-------------------------------------------------------------------------|
| <b>1</b>                                                                                                          | LEADSUP*DONTGOCOLD*EDUCATI<br>ON        | 1               | 1   | 0.7                 | 0.3                        | Ribner; Lopes; Thomas,<br>Lavela, Heinrich,<br>LeMaitre; Guanche Garcel |
| <b>2</b>                                                                                                          | LEADSUP*DONTGOCOLD*<br>TWOWAYENG*letter | 1               | 1   | 0.5                 | 0.1                        | Honda; Thomas, Lavela,<br>Heinrich, LeMaitre                            |
| <b>3</b>                                                                                                          | leadsup*EDUC*LETTER                     | 1               | 1   | 0.2                 | 0.2                        | Shannon; Sadlier                                                        |
| <b>M<br/>1</b>                                                                                                    |                                         | 1               | 1   | 1                   |                            |                                                                         |
| <b>leadsup*EDUC*LETTER + LEADSUP*DONTGOCOLD*EDUCATION +<br/>LEADSUP*DONTGOCOLD*TWOWAYENG*letter =&gt; SUCCESS</b> |                                         |                 |     |                     |                            |                                                                         |

304 Notes: See Table 3 for condition names; Upper case conditions indicate the condition is present and lower case indicate a  
305 condition is absent; \* = 'AND' relationship; + = 'OR' relationship; Raw coverage: share of outcome covered by a  
306 configuration; Unique coverage: share of outcome uniquely coverage by a configuration



307 Boolean minimisation, and the generation of an enhanced intermediate solution identified three  
308 simplified pathways of soft mandate and other intervention implementation that led to greater  
309 vaccination uptake as illustrated in Table 4 above. These mirror the elements in the solution for hard  
310 mandates, with the first two pathways involving conditions around leading from the front and ‘don’t-  
311 go-in-cold’. In the first pathway, an additional condition for education was part of the configurations,  
312 with the seven studies featuring in this pathway representing a mixture of letters and research  
313 articles. In addition to ‘leading from the front’ and ‘don’t-go-in-cold’, the second pathway also includes  
314 a condition that is complex to capture within a letter – two way engagement – and unsurprisingly all  
315 five cases supporting this pathway were reported in full research articles. The third configuration  
316 involved two studies, reported as letters only, with additional conditions representing the absence of  
317 reported leadership support and the presence of education. This third pathway consists of two  
318 studies where the narrow confines of a letter are unlikely to have allowed for more complex  
319 mechanisms and processes such as ‘leaderships support’, two-way engagement, and ‘don’t go in  
320 cold’. The data in this QCA model were crisp-set, which facilitated the identification of all instances of  
321 the outcome (coverage value of 1) with a coverage score of 1.

322 Having developed familiarity with the framework and the conditions, we then examined the hard  
323 mandates using the crisp-set coding framework developed for the soft mandate/other intervention  
324 analysis, and distinguishing those four studies with a RR (<0.2) as (most) successful. Working through  
325 the same procedures as the earlier analyses, an enhanced intermediate solution was generated that  
326 once again emphasised the importance of ‘leading from the front’, ‘don’t go in cold’ and ‘two-way  
327 engagement’ as processes sufficient for generating a successful intervention (Table 5).

328 Further checks on the solutions represented in tables 2, 4 and 5 were undertaken. These showed that  
329 the solutions did not also trigger the negation of the outcome (a possibility in QCA due to causal  
330 asymmetry), and the enhanced intermediate solution generated, using the algorithm developed by

331 Dusa (2018), ensured that untenable simplifying assumptions were not included in deriving our  
 332 preferred solution.

333 **Table 5: Minimised intermediate solution for crisp-set hard mandate QCA**

|                                                  |                                  | <b>Consistency</b> | <b>PRI</b> | <b>Raw Coverage</b> | <b>Unique Coverage</b> | <b>cases</b>                      |
|--------------------------------------------------|----------------------------------|--------------------|------------|---------------------|------------------------|-----------------------------------|
| <b>1</b>                                         | TWOWAYENG*LEADSUP*DONTGO<br>COLD | 1                  | 1          | 1                   | -                      | Stuart; Babcock,<br>Rakita, Smith |
| <b>M</b>                                         |                                  | 1                  | 1          | 1                   |                        |                                   |
| <b>1</b>                                         |                                  |                    |            |                     |                        |                                   |
| <b>TWOWAYENG*LEADSUP*DONTGOCOLD=&gt; SUCCESS</b> |                                  |                    |            |                     |                        |                                   |

334 Notes: See Table 3 for condition names; Upper case conditions indicate the condition is present and lower case indicate a  
 335 condition is absent; \* = 'AND' relationship; + = 'OR' relationship; Raw coverage: share of outcome covered by a  
 336 configuration; Unique coverage: share of outcome uniquely coverage by a configuration

## 337 Discussion

338 The above findings reveal that a 'leading from the front' rather than a 'top-down' approach enhances  
 339 the effectiveness of flu vaccination drives to increase uptake among HCW. Interestingly, this approach  
 340 seems to enhance the effectiveness of both hard-mandate approaches and soft-mandates or other  
 341 approaches. These findings are particularly striking given that the 'leading from the front logic'  
 342 appears to be somewhat in contrast with the overt intervention logic of hard mandates being 'sticks'  
 343 or sanctions to enforce compliance with vaccination drives. By revealing this more nuanced take on  
 344 hard mandate approaches, our analyses provide additional support for organisations seeking to  
 345 implement compulsory vaccination drives. Moreover, without this nuanced understanding of key  
 346 implementation and contextual factors hard mandate approaches may become ineffective in the

347 longer term. And indeed, the lessons learned from these analyses on flu vaccination uptake, may have  
348 broader relevance given the twin global concerns of vaccine hesitancy and COVID-19.

349 Strategies to vaccinate HCWs against infectious diseases have been thrown into sharp relief by the  
350 COVID-19 pandemic and the large-scale efforts to vaccinate HCWs against the SARS-CoV-2 virus taking  
351 place across countries. Achieving success in campaigns to vaccinate HCWs is of paramount  
352 importance as a means of reducing transmission of the virus to vulnerable patients and in order to  
353 protect HCWs due to their increased exposure. However, success in vaccinating HCWs is also likely to  
354 have broader implications in terms of vaccination uptake, due the influence of HCWs in decisions  
355 about vaccination uptake among the general population [48]. The components highlighted here  
356 suggest that successful vaccination campaigns among HCWs are dependent on complex conditions,  
357 including ‘don’t-go-in-cold’, ‘two-way engagement’ and ‘leading-from-the-front’. Rather than being  
358 aligned with any particular model or specific components or activities, these conditions could be  
359 considered design principles to be incorporated into future vaccination campaigns. These conditions  
360 may also have some salience in considering wider pandemic control measures. In the UK context for  
361 example, which at the time of writing has the highest death rate of any large country [49],  
362 explanations put forward for non-adherence to pandemic control measures among the general  
363 population have parallels with the conditions identified here. For example, the high-profile breach of  
364 stay-at-home and social distancing requirements by Dominic Cummings, the Prime Minister’s special  
365 advisor, and the subsequent defence of his actions by members of the UK cabinet, has been  
366 attributed to weakening adherence to the rules among the population [50]; such actions could be  
367 viewed as being in direct opposition to ‘leading-from-the-front’. In contrast, a recent video released  
368 by Black UK politicians encouraging vaccine uptake [51], a similar video by British Asian celebrities and  
369 politicians [52], as well as the efforts of UK Imams to counter vaccine hesitancy among the UK’s  
370 Muslim population [53], can all be viewed as emblematic of ‘leading-from-the-front’.

## 371 Strengths and limitations

372 This study presents several innovations that help to advance the use of QCA as an evidence synthesis  
373 method. First, the QCA drew on a theory developed from the observations of triallists themselves,  
374 from the ‘ground up’ and akin to a grounded theory approach. Previous QCA syntheses of systematic  
375 review findings have either necessitated drawing on intervention theories derived from logic models  
376 with syntheses of process evaluation studies [54], or other separate in-depth qualitative evidence  
377 syntheses [16]. The findings here suggest that, in the absence of extant intervention theory or pre-  
378 existing synthesis, that working/pragmatic theories can be developed to support QCA synthesis from  
379 experiential evidence that is usually overlooked in other synthesis methods, using an ICA framework.  
380 Second, this study showed that a theory of how interventions ‘work’, developed through the synthesis  
381 of one set of studies using QCA (i.e. the hard mandate studies), can be applied to a conceptually  
382 congruent set of separate studies (i.e. the soft mandate and other intervention studies). This form of  
383 triangulation can represent a useful adjunct to QCA analyses in systematic reviews that could help to  
384 create more robust syntheses in the future. Third, the study also provided a comparison between  
385 using fuzzy-set and crisp-set coding schema on the same dataset (hard mandate studies). While  
386 similar results were obtained, again providing a further degree of triangulation, the fuzzy-set coding  
387 for the hard mandate studies was a more appropriate choice conceptually. This was with respect to  
388 both the coding for the outcome, where all the studies had obtained significant reductions in  
389 unvaccinated (despite heterogeneity in the original meta-analysis [9]), as well as the conditions,  
390 where in the case of ‘don’t go in cold’ in particular, different levels of previous engagement were  
391 apparent among some hard mandate studies in a way which wasn’t as apparent for studies on soft  
392 mandates and other intervention modes. Fourth, this is the first example that we are aware of where  
393 ‘publication type’ was included in the analysis and was predictive of outcomes. This work thus  
394 provides some evidence in support of one issue that’s been long suspected in systematic reviews: that  
395 the lack of information in some papers / publications can lead to unreliable review results – and  
396 possibly undermine other subgroup analyses [55]. Finally, this study once again is further

397 demonstration of the potential for further adjunct analysis of evidence that has already been  
398 assembled and synthesised in some form, to address new questions and generate new  
399 understandings. This study drew on ICA/QCA; other techniques for the reanalysis of existing review  
400 evidence have also been suggested elsewhere [56]. Given the large volume of systematic reviews  
401 being published annually, each requiring substantial investment and sometimes generating conflicting  
402 results or interpretations, techniques for further probing of the included studies to provide additional  
403 nuance or address questions not considered by the original reviewers, may continue to develop as a  
404 promising adjunct stream of evidence synthesis.

405 While the analyses presented here are of importance, both in (i) revealing some of the conditions  
406 sufficient to result in successful influenza vaccination campaigns: as well as (ii) emphasising the  
407 potential of ICA/QCA in enhancing our understanding of existing review evidence, some limitations  
408 should be noted. An important limitation is around the approach itself and its capacity to consistently  
409 and correctly reveal complex causal relationships. There exist some critiques around the potential of  
410 QCA to produce correct solutions in simulation studies [57], although responses provided by others  
411 not only highlight flaws in these critiques, but also emphasise that a QCA solution cannot be  
412 generated and articulated in the absence of case and substantive knowledge [58]. While we regard  
413 the use of ICA to generate theory to underpin QCA as a useful innovation in the field; we nevertheless  
414 recognise that trial reports remain sparse in terms of reporting intervention details [12], and despite  
415 the allowances we made for sparse reporting in letters, 'missing data' may be a further caveat on the  
416 results. Finally, while we generated an enhanced intermediate solution, following procedures  
417 developed by Duşa [47], the treatment of logical remainders somewhat contested and unresolved in  
418 the literature [59], which could represent a final caveat to these results. However, since QCA requires  
419 that the solution is consistent with a programme theory that is identifiable in all relevant cases, it can  
420 be seen, in some ways, as having a higher bar for achieving a credible explanation than statistical  
421 analysis. In a statistical analysis, deviant cases might increase variance / confidence intervals, but are  
422 considered 'explained' when this happens. In a QCA, a deviant case indicates that a credible solution

423 that properly explains what is going on has not be found, so further analysis is required. As such, given  
424 that we identified consistent patterns of association across several independent research studies and  
425 that the detail of each case was consistent with our 'leading from the front' theory, the credibility of  
426 these findings is strengthened.

## 427 Conclusion

428 Regardless of intervention type a 'leading from the front' approach to implementation, which  
429 incorporates building on institutional knowledge, education, opportunities for two-way engagement  
430 and strong leadership support, will likely enhance the success of HCW flu vaccination drives. While  
431 the results pertain to flu vaccination and HCW populations, the nuanced understanding of effective  
432 intervention strategies identified here may be useful in the urgent efforts to vaccinate HCW and the  
433 general public against COVID-19.

## 434 Acknowledgements

435 This paper was initially developed as part of a small project funded by the UCL Global Engagement  
436 Fund on 'Improving our understanding of how interventions 'work' in Oceania' and builds on reviews  
437 and methodological work conducted for The London/York NIHR Policy Research Programme Reviews  
438 Facility. We are very grateful for all the support we received from Associate Professor Cath  
439 Chamberlain at Latrobe University, who made the project possible, as well as the input from  
440 participants at QCA workshops held in Melbourne (Latrobe) and Adelaide. Finally, this study  
441 represents a re-analysis of previous work by Theodore Lytras and colleagues (2016) and Theo Lorenc  
442 and colleagues (2017). This study could not have been conducted without the diligent work of both  
443 author teams which preceded this study and facilitated re-analysis of this literature. However, neither  
444 the Lyras or Lorenc team were involved in the study reported here, and the views and results  
445 expressed are those of the authors and not necessarily those of the Lytras or Lorenc author teams,  
446 the NHS, the NIHR, the Department of Health and Social Care, or its partners.

## 447 References

- 448 1. Public Health England. Influenza: The Green Book, Chapter 19. London: Crown 2019  
449 [Available from:  
450 [https://assets.publishing.service.gov.uk/government/uploads/system/uploads/attachment\\_data/file/796886/GreenBook\\_Chapter\\_19\\_Influenza\\_April\\_2019.pdf](https://assets.publishing.service.gov.uk/government/uploads/system/uploads/attachment_data/file/796886/GreenBook_Chapter_19_Influenza_April_2019.pdf).  
451
- 452 2. Kuster SP, Shah PS, Coleman BL, Lam P-P, Tong A, Wormsbecker A, et al. Incidence of  
453 Influenza in Healthy Adults and Healthcare Workers: A Systematic Review and Meta-Analysis. PLOS  
454 ONE. 2011;6(10):e26239.
- 455 3. public Health England. Seasonal influenza vaccine uptake in healthcare workers (HCWs) in  
456 England: winter season2018 to 2019 London: Public Health England; 2019 [Available from:  
457 [https://assets.publishing.service.gov.uk/government/uploads/system/uploads/attachment\\_data/file/804885/Seasonal\\_influenza\\_vaccine\\_uptake-HCWs-2018\\_Final.pdf](https://assets.publishing.service.gov.uk/government/uploads/system/uploads/attachment_data/file/804885/Seasonal_influenza_vaccine_uptake-HCWs-2018_Final.pdf).  
458
- 459 4. Ahmed F, Lindley MC, Allred N, Weinbaum CM, Grohskopf L. Effect of Influenza Vaccination  
460 of Healthcare Personnel on Morbidity and Mortality Among Patients: Systematic Review and Grading  
461 of Evidence. Clinical Infectious Diseases. 2014;58(1):50-7.
- 462 5. Gualano MR, Olivero E, Voglino G, Corezzi M, Rossello P, Vicentini C, et al. Knowledge,  
463 attitudes and beliefs towards compulsory vaccination: a systematic review. Human Vaccines &  
464 Immunotherapeutics. 2019;15(4):918-31.
- 465 6. Dickson K, Stansfield C, Kwan I, Khatwa M. Acceptability and uptake of vaccines: Rapid map  
466 of systematic reviews London: EPPI-Centre, Social Science Research Unit, UCL Institute of Education,  
467 University College London; 2021 [Available from:  
468 [http://eppi.ioe.ac.uk/cms/Projects/DepartmentofHealthandSocialCare/Publishedreviews\(bydate\)/Ac  
469 ceptabilityanduptakeofvaccinesRapidmapofsystematicreviews/tabid/3800/Default.aspx](http://eppi.ioe.ac.uk/cms/Projects/DepartmentofHealthandSocialCare/Publishedreviews(bydate)/AcceptabilityanduptakeofvaccinesRapidmapofsystematicreviews/tabid/3800/Default.aspx).
- 470 7. Dror AA, Eisenbach N, Taiber S, Morozov NG, Mizrahi M, Zigran A, et al. Vaccine hesitancy:  
471 the next challenge in the fight against COVID-19. European Journal of Epidemiology. 2020;35(8):775-  
472 9.
- 473 8. Bandyopadhyay S, Baticulon RE, Kadhun M, Alser M, Ojuka DK, Badereddin Y, et al. Infection  
474 and mortality of healthcare workers worldwide from COVID-19: a systematic review. BMJ Global  
475 Health. 2020;5(12):e003097.
- 476 9. Lytras T, Kopsachilis F, Mouratidou E, Papamichail D, Bonovas S. Interventions to increase  
477 seasonal influenza vaccine coverage in healthcare workers: A systematic review and meta-regression  
478 analysis. Human Vaccines & Immunotherapeutics. 2016;12(3):671-81.
- 479 10. Lorenc T, Marshall D, Wright K, Sutcliffe K, Sowden A. Seasonal influenza vaccination of  
480 healthcare workers: evidence synthesis. London: EPPI-Centre, Social Science Research Unit, UCL  
481 Institute of Education, University College London; 2018
- 482 11. Glasziou PP, Chalmers I, Green S, Michie S. Intervention synthesis: a missing link between a  
483 systematic review and practical treatment(s). PLoS Med. 2014;11(8):e1001690-e.
- 484 12. Hoffmann TC, Oxman AD, Ioannidis JPA, Moher D, Lasserson TJ, Tovey DI, et al. Enhancing  
485 the usability of systematic reviews by improving the consideration and description of interventions.  
486 BMJ. 2017;358:j2998.
- 487 13. Finch M. Point: Mandatory Influenza Vaccination for All Health Care Workers? Seven Reasons  
488 to Say “No”. Clinical Infectious Diseases. 2006;42(8):1141-3.
- 489 14. Rihoux B, Ragin C. Configurational Comparative Methods: Qualitative Comparative Analysis  
490 (QCA) And Related Techniques. London: Sage; 2009.
- 491 15. Thomas J, O’Mara-Eves A, Brunton G. Using qualitative comparative analysis (QCA) in  
492 systematic reviews of complex interventions: a worked example. Systematic Reviews. 2014;3(1):67.
- 493 16. Melendez-Torres GJ, Sutcliffe K, Burchett HED, Rees R, Richardson M, Thomas J. Weight  
494 management programmes: Re-analysis of a systematic review to identify pathways to effectiveness.  
495 Health Expectations. 2018;21(3):574-84.

- 496 17. Sutcliffe K, Thomas J, Stokes G, Hinds K, Bangpan M. Intervention Component Analysis (ICA):  
497 a pragmatic approach for identifying the critical features of complex interventions. *Systematic*  
498 *Reviews*. 2015;4(1):140.
- 499 18. Boulton E, Kneale D, Stansfield C, Heron P, Sutcliffe K, Hayanga B, et al. Rapid systematic  
500 review of systematic reviews: what befriending, social support and low intensity psychosocial  
501 interventions, delivered remotely, are effective in reducing social isolation and loneliness among  
502 older adults? How do they work? [version 1; peer review: awaiting peer review]. *F1000Research*.  
503 2020;9(1368).
- 504 19. Kneale D, Sutcliffe K, Thomas J. CARU-QCA: A tool to critically appraise and support the  
505 reporting of systematic reviews that use qualitative comparative analysis In preparation.
- 506 20. Awali RA, Samuel PS, Marwaha B, Ahmad N, Gupta P, Kumar V, et al. Understanding health  
507 care personnel's attitudes toward mandatory influenza vaccination. *American journal of infection*  
508 *control*. 2014;42(6):649-52.
- 509 21. Babcock HM, Gemeinhart N, Jones M, Dunagan WC, Woeltje KF. Mandatory Influenza  
510 Vaccination of Health Care Workers: Translating Policy to Practice. *Clinical Infectious Diseases*.  
511 2010;50(4):459-64.
- 512 22. Ksienski DS. Mandatory seasonal influenza vaccination or masking of British Columbia health  
513 care workers: Year 1. *Canadian journal of public health = Revue canadienne de sante publique*.  
514 2014;105(4):e312-6.
- 515 23. Podczervinski S, Stednick Z, Helbert L, Davies J, Jagels B, Gooley T, et al. Employee influenza  
516 vaccination in a large cancer center with high baseline compliance rates: Comparison of carrot  
517 versus stick approaches. *American journal of infection control*. 2015;43(3):228-33.
- 518 24. Rakita RM, Hagar BA, Crome P, Lammert JK. Mandatory influenza vaccination of healthcare  
519 workers: a 5-year study. *Infection control and hospital epidemiology*. 2010;31(9):881-8.
- 520 25. Smith DR, Van Cleave B. Influenza vaccination as a condition of employment for a large  
521 regional health care system. *WMJ : official publication of the State Medical Society of Wisconsin*.  
522 2012;111(2):68-71.
- 523 26. Stuart RL, Gillespie EE, Kerr PG. A pilot study of an influenza vaccination or mask mandate in  
524 an Australian tertiary health service. *The Medical journal of Australia*. 2014;200(2):83-4.
- 525 27. Drees M, Wroten K, Smedley M, Mase T, Schwartz JS. Carrots and sticks: achieving high  
526 healthcare personnel influenza vaccination rates without a mandate. *Infection control and hospital*  
527 *epidemiology*. 2015;36(6):717-24.
- 528 28. Frenzel E, Chemaly RF, Ariza-Heredia E, Jiang Y, Shah DP, Thomas G, et al. Association of  
529 increased influenza vaccination in health care workers with a reduction in nosocomial influenza  
530 infections in cancer patients. *American journal of infection control*. 2016;44(9):1016-21.
- 531 29. Leibu R, Maslow J. Effectiveness and acceptance of a health care-based mandatory  
532 vaccination program. *Journal of occupational and environmental medicine*. 2015;57(1):58-61.
- 533 30. Heinrich-Morrison K, McLellan S, McGinnes U, Carroll B, Watson K, Bass P, et al. An effective  
534 strategy for influenza vaccination of healthcare workers in Australia: experience at a large health  
535 service without a mandatory policy. *BMC infectious diseases*. 2015;15:42.
- 536 31. Honda H, Sato Y, Yamazaki A, Padival S, Kumagai A, Babcock H. A successful strategy for  
537 increasing the influenza vaccination rate of healthcare workers without a mandatory policy outside  
538 of the United States: a multifaceted intervention in a Japanese tertiary care center. *Infection control*  
539 *and hospital epidemiology*. 2013;34(11):1194-200.
- 540 32. LaVela SL, Hill JN, Smith BM, Evans CT, Goldstein B, Martinello R. Healthcare worker  
541 influenza declination form program. *American journal of infection control*. 2015;43(6):624-8.
- 542 33. Lemaitre M, Meret T, Rothan-Tondeur M, Belmin J, Lejonc JL, Luquel L, et al. Effect of  
543 influenza vaccination of nursing home staff on mortality of residents: a cluster-randomized trial.  
544 *Journal of the American Geriatrics Society*. 2009;57(9):1580-6.



- 545 34. Lopes MH, Sartori AM, Mascheretti M, Chaves TS, Andreoli RM, Basso M, et al. Intervention  
546 to increase influenza vaccination rates among healthcare workers in a tertiary teaching hospital in  
547 Brazil \*. *Infection control and hospital epidemiology*. 2008;29(3):285-6.
- 548 35. Ribner BS, Hall C, Steinberg JP, Bornstein WA, Chakkalakal R, Emamifar A, et al. Use of a  
549 mandatory declination form in a program for influenza vaccination of healthcare workers. *Infection  
550 control and hospital epidemiology*. 2008;29(4):302-8.
- 551 36. Shannon SC. Community hospitals can increase staff influenza vaccination rates. *American  
552 journal of public health*. 1993;83(8):1174-5.
- 553 37. Thomas DR, Winsted B, Koontz C. Improving neglected influenza vaccination among  
554 healthcare workers in long-term care. *Journal of the American Geriatrics Society*. 1993;41(9):928-30.
- 555 38. Camargo-Ángeles R, Villanueva-Ruiz CO, García-Román V, Mendoza-García JL, Conesa-  
556 Peñuela FJ, Tenza Iglesias I, et al. [Evaluation of a novel flu vaccination campaign among health  
557 personnel for the 2011-2012 season]. *Archivos de prevencion de riesgos laborales*. 2014;17(1):26-30.
- 558 39. Dey P, Halder S, Collins S, Benons L, Woodman C. Promoting uptake of influenza vaccination  
559 among health care workers: a randomized controlled trial. *Journal of public health medicine*.  
560 2001;23(4):346-8.
- 561 40. Doratotaj S, Macknin ML, Worley S. A novel approach to improve influenza vaccination rates  
562 among health care professionals: A prospective randomized controlled trial. *American journal of  
563 infection control*. 2008;36(4):301-3.
- 564 41. Leitmeyer K, Buchholz U, Kramer M, Schenkel K, Stahlhut H, Köllstadt M, et al. Influenza  
565 vaccination in German health care workers: effects and findings after two rounds of a nationwide  
566 awareness campaign. *Vaccine*. 2006;24(47-48):7003-8.
- 567 42. Rothan-Tondeur M, Filali-Zegzouti Y, Golmard JL, De Wazieres B, Piette F, Carrat F, et al.  
568 Randomised active programs on healthcare workers' flu vaccination in geriatric health care settings  
569 in France: the VESTA study. *The journal of nutrition, health & aging*. 2011;15(2):126-32.
- 570 43. Smedley J, Palmer C, Baird J, Barker M. A survey of the delivery and uptake of influenza  
571 vaccine among health care workers. *Occupational Medicine*. 2002;52(5):271-6.
- 572 44. Zimmerman RK, Nowalk MP, Lin CJ, Raymund M, Fox DE, Harper JD, et al. Factorial design for  
573 improving influenza vaccination among employees of a large health system. *Infection control and  
574 hospital epidemiology*. 2009;30(7):691-7.
- 575 45. Stone A, Russell R, Patterson K. Transformational versus servant leadership: a difference in  
576 leader focus. *Leadership & Organization Development Journal*. 2004;25:349-61.
- 577 46. Bonell C, Jamal F, Melendez-Torres GJ, Cummins S. 'Dark logic': theorising the harmful  
578 consequences of public health interventions. *Journal of Epidemiology and Community Health*.  
579 2015;69(1):95.
- 580 47. Duşa A. *QCA with R: A comprehensive resource*. : Springer.; 2018.
- 581 48. Karafillakis E, Dinca I, Apfel F, Cecconi S, Würz A, Takacs J, et al. Vaccine hesitancy among  
582 healthcare workers in Europe: A qualitative study. *Vaccine*. 2016;34(41):5013-20.
- 583 49. Mortality Analyses - Johns Hopkins Coronavirus Resource Center [Available from:  
584 <https://coronavirus.jhu.edu/data/mortality>].
- 585 50. Fancourt D, Steptoe A, Wright L. The Cummings effect: politics, trust, and behaviours during  
586 the COVID-19 pandemic. *Lancet (London, England)*. 2020;396(10249):464-5.
- 587 51. BBC. Coronavirus: Black MPs unite in video to encourage vaccine take-up 2021 [Available  
588 from: <https://www.bbc.co.uk/news/uk-politics-55839493>].
- 589 52. BBC. British Asian celebrities unite for video to dispel Covid vaccine myths 2021 [Available  
590 from: <https://www.bbc.co.uk/news/entertainment-arts-55809355>].
- 591 53. Aljazeera. UK imams, influencers counter COVID vaccine misinformation 2021 [Available  
592 from: [https://www.aljazeera.com/news/2021/1/22/uk-imams-mobilise-to-counter-covid-19-  
593 vaccine-disinformation](https://www.aljazeera.com/news/2021/1/22/uk-imams-mobilise-to-counter-covid-19-vaccine-disinformation)].

- 594 54. Harris K, Kneale D, Lasserson TJ, McDonald VM, Grigg J, Thomas J. School-based self-  
595 management interventions for asthma in children and adolescents: a mixed methods systematic  
596 review. *The Cochrane database of systematic reviews*. 2019;1(1):Cd011651.
- 597 55. Hoffmann TC, Glasziou PP, Boutron I, Milne R, Perera R, Moher D, et al. Better reporting of  
598 interventions: template for intervention description and replication (TIDieR) checklist and guide. *BMJ*  
599 : *British Medical Journal*. 2014;348:g1687.
- 600 56. Kneale D, Thomas J, O'Mara-Eves A, Wiggins R. How can additional secondary data analysis  
601 of observational data enhance the generalisability of meta-analytic evidence for local public health  
602 decision making? *Research synthesis methods*. 2019;10(1):44-56.
- 603 57. Lucas SR, Szatrowski A. Qualitative Comparative Analysis in Critical Perspective. *Sociological*  
604 *Methodology*. 2014;44(1):1-79.
- 605 58. Ragin CC. Comment:Lucas and Szatrowski in Critical Perspective. *Sociological Methodology*.  
606 2014;44(1):80-94.
- 607 59. Baumgartner M, Thiem A. Model Ambiguities in Configurational Comparative Research.  
608 *Sociological Methods & Research*. 2017;46(4):954-87.

609

## Supporting information

### Hard mandate (Analysis 1) Fuzzy set Data table

| Studies           | Outcome set | Don't go in (DONTGOC OLD) | Educational Component (EDUC) | Information other (INFORM)* | Two-way engagement (TWOWAY ENG) | Stigma (STIGMA)* | Strong Leadership Support (LEADS UP) | Multi-setting (MULTI)* |
|-------------------|-------------|---------------------------|------------------------------|-----------------------------|---------------------------------|------------------|--------------------------------------|------------------------|
| Awali             | 0.33        | 0.33                      | 0                            | 0.66                        | 0                               | 0                | 0                                    | 0                      |
| Babcock           | 1           | 1                         | 1                            | 0                           | 0.66                            | 0                | 1                                    | 0.66                   |
| Drees             | 0.66        | 1                         | 1                            | 0.66                        | 0                               | 1                | 0.66                                 | 0.33                   |
| Frenzel           | 0.66        | 1                         | 1                            | 0.66                        | 0                               | 0.66             | 1                                    | 0.33                   |
| Hospital-Ksienski | 0.33        | 0                         | 0                            | 1                           | 0                               | 0.66             | 0                                    | 1                      |
| ResiCare-Ksienski | 0.33        | 0                         | 0                            | 1                           | 0                               | 0.66             | 0                                    | 1                      |
| Leibu             | 0.66        | 0                         | 0                            | 0.33                        | 0                               | 0                | 0                                    | 0.66                   |
| Podscervinski     | 0.33        | 1                         | 0                            | 0.66                        | 0                               | 0.33             | 1                                    | 0                      |
| Rakita            | 1           | 0.66                      | 1                            | 0.66                        | 1                               | 0                | 1                                    | 0.66                   |
| smith             | 1           | 0.66                      | 1                            | 0.66                        | 0.66                            | 0                | 1                                    | 0.66                   |
| stuart            | 1           | 1                         | 0                            | 0.33                        | 1                               | 0                | 1                                    | 0.33                   |

\*Not included in final models

Soft mandate/other (Analysis 2) Data table

| Study                      | Success | Stigma (STIGMA)* | Strong Leaders Support (LEADSUP) | Don't go in cold (DONTGO COLD) | Two-way engagement (TWO WAY ENG) | Information on other (INFORM)* | Education Component (EDUC) | Multi-setting (MULTI)* | Letter only |
|----------------------------|---------|------------------|----------------------------------|--------------------------------|----------------------------------|--------------------------------|----------------------------|------------------------|-------------|
| Dey                        | 0       | 0                | 0                                | 0                              | 1                                | 0                              | 1                          | 1                      | 0           |
| Doratoraj letter           | 0       | 0                | 0                                | 1                              | 0                                | 0                              | 1                          | 0                      | 0           |
| Smedley                    | 0       | 0                | 0                                | 1                              | 1                                | 0                              | 1                          | 0                      | 0           |
| Camarago                   | 0       | 0                | 0                                | 1                              | 0                                | 0                              | 1                          | 0                      | 0           |
| Rothan-Tondeur (educ only) | 0       | 0                | 1                                | 0                              | 0                                | 0                              | 1                          | 1                      | 0           |
| Zimmerman incentives       | 0       | 0                | 0                                | 1                              | 0                                | 0                              | 1                          | 0                      | 0           |
| Zimmerman                  | 0       | 0                | 0                                | 1                              | 0                                | 0                              | 1                          | 0                      | 0           |

|                              |   |   |   |   |   |   |   |   |   |
|------------------------------|---|---|---|---|---|---|---|---|---|
| <b>increase<br/>d access</b> |   |   |   |   |   |   |   |   |   |
| <b>Leitmeyer</b>             | 0 | 0 | 0 | 0 | 0 | 0 | 1 | 1 | 0 |
| <b>Deyb</b>                  | 0 | 0 | 0 | 0 | 1 | 0 | 1 | 1 | 0 |
| <b>Doratorajb - raffle</b>   | 0 | 0 | 0 | 1 | 0 | 0 | 0 | 0 | 0 |
| <b>Lopes</b>                 | 1 | 0 | 1 | 1 | 0 | 0 | 1 | 0 | 1 |
| <b>Ribner</b>                | 1 | 0 | 1 | 1 | 0 | 0 | 1 | 0 | 0 |
| <b>Shannon</b>               | 1 | 0 | 0 | 0 | 0 | 0 | 1 | 0 | 1 |
| <b>Thomas</b>                | 1 | 0 | 1 | 1 | 1 | 0 | 1 | 0 | 0 |
| <b>Lavela</b>                | 1 | 0 | 1 | 1 | 1 | 0 | 1 | 0 | 0 |
| <b>Heinrich</b>              | 1 | 1 | 1 | 1 | 1 | 1 | 1 | 0 | 0 |
| <b>LeMaitre</b>              | 1 | 0 | 1 | 1 | 1 | 0 | 1 | 1 | 0 |
| <b>Honda</b>                 | 1 | 0 | 1 | 1 | 1 | 0 | 0 | 0 | 0 |
| <b>Guanche<br/>Garcel</b>    | 1 | 0 | 1 | 1 | 1 | 0 | 1 | 0 | 1 |
| <b>Sadlier</b>               | 1 | 0 | 0 | 1 | 1 | 0 | 1 | 0 | 1 |

\*Not included in final models

### Hard mandate (Analysis 1) Crisp set Data table

| <b>Studies</b> | <b>RR</b> | <b>Outcome set</b> | <b>Don't go in cold (DONTGOCOLD)</b> | <b>Education Component (EDUC)</b> | <b>Two-way engagement (TWOWAYENG)</b> | <b>Strong Leadership Support (LEADSUP)</b> |
|----------------|-----------|--------------------|--------------------------------------|-----------------------------------|---------------------------------------|--------------------------------------------|
|                |           |                    |                                      |                                   |                                       |                                            |

|                               |      |   |   |   |   |   |
|-------------------------------|------|---|---|---|---|---|
| <b>Awali</b>                  | 0.35 | 0 | 1 | 0 | 0 | 0 |
| <b>Babcock</b>                | 0.06 | 1 | 1 | 1 | 1 | 1 |
| <b>Drees</b>                  | 0.24 | 0 | 1 | 1 | 0 | 1 |
| <b>Frenzel</b>                | 0.21 | 0 | 1 | 1 | 0 | 1 |
| <b>Hospital-<br/>Ksienski</b> | 0.44 | 0 | 0 | 0 | 0 | 0 |
| <b>ResiCare-<br/>Ksienski</b> | 0.57 | 0 | 0 | 0 | 0 | 0 |
| <b>Leibu</b>                  | 0.22 | 0 | 0 | 0 | 0 | 0 |
| <b>podscervinsc<br/>i</b>     | 0.42 | 0 | 1 | 0 | 0 | 1 |
| <b>Rakita</b>                 | 0.05 | 1 | 1 | 1 | 1 | 1 |
| <b>smith</b>                  | 0.08 | 1 | 1 | 1 | 1 | 1 |
| <b>stuart</b>                 | 0.14 | 1 | 1 | 0 | 1 | 1 |

Hard Mandate (Analysis 1) Crisp Set Truth table

| Two-way<br>engagement | Strong Leadership | Support | Education | Don't go in cold<br>(DONTGOCOLD) | Outcome | Number of<br>Studies | Consistency | PRI | cases                        |
|-----------------------|-------------------|---------|-----------|----------------------------------|---------|----------------------|-------------|-----|------------------------------|
| 1                     | 1                 | 1       | 1         | 1                                | 1       | 3                    | 1           | 1   | Babcock,<br>Rakita,<br>Smith |
| 1                     | 1                 | 0       | 1         | 1                                | 1       | 1                    | 1           | 1   | Stuart                       |

|   |   |   |   |   |   |   |   |                                                                 |
|---|---|---|---|---|---|---|---|-----------------------------------------------------------------|
| 0 | 0 | 0 | 0 | 0 | 3 | 0 | 0 | Ksienski A<br>(Hospital),<br>Ksienski B<br>(ResiCare),<br>Leibu |
| 0 | 1 | 1 | 1 | 0 | 2 | 0 | 0 | Drees,<br>Frenzel                                               |
| 0 | 0 | 0 | 1 | 0 | 1 | 0 | 0 | Awali                                                           |
| 0 | 1 | 0 | 1 | 0 | 1 | 0 | 0 | Podscervins<br>ci                                               |

Hard mandate data table with evidence

|         |            |                                                          |                   |                                                                                                                                                 |                                                                                                                                             |                                                                                                                                                       |                                                                                                                                                      |                                                                                                                                                             |                                                                                                                                                                                       |                                                                                                                                                                                |
|---------|------------|----------------------------------------------------------|-------------------|-------------------------------------------------------------------------------------------------------------------------------------------------|---------------------------------------------------------------------------------------------------------------------------------------------|-------------------------------------------------------------------------------------------------------------------------------------------------------|------------------------------------------------------------------------------------------------------------------------------------------------------|-------------------------------------------------------------------------------------------------------------------------------------------------------------|---------------------------------------------------------------------------------------------------------------------------------------------------------------------------------------|--------------------------------------------------------------------------------------------------------------------------------------------------------------------------------|
|         |            |                                                          |                   | 'Don't go in cold'<br>(Have there been other previous vaccination campaigns prior to current hard mandate intervention to change behaviours)    | Was education provided to improve knowledge among HCW of vaccination benefits and risks?                                                    | Were Healthcare Workers encouraged to inform on others?                                                                                               | Two-way engagement/bidirectional communication                                                                                                       | Stigma                                                                                                                                                      | Area policies implemented across institutions                                                                                                                                         | Leading from the front – did senior staff engage in the campaign                                                                                                               |
| Studies | Risk Ratio | Percentage of HCWs vaccinated at the end of intervention | Outcome set value | 0 – No effort mentioned<br>0.33 – Sanction-based or accountability-based efforts only previously<br>0.66 – Incentivisation and health promotion | 0 – No education provided or education did not improve levels of knowledge<br>1 – Education provided that improved knowledge of the vaccine | 1 – Employees encouraged to inform on colleagues<br>0.66 – Managers observed compliance<br>0 – No evidence of policy implemented across all employees | 0 - not stated<br>0.66 - engagement not continuously sought and no formal system - ad hoc<br>1 - formal processes for two way engagement established | 0 – not stated<br>0.33 – stigmatising process of declination<br>0.66 – public display of vaccination status enforced only<br>1 – stigmatising language with | 0 – single institution<br>0.33 – multiple institutions and/or number of employees >1,500<br>0.66 – multicentre institutions<br>1 – Area based interventions (e.g. states or counties) | 0 – not stated<br>0.66 – leadership approved and facilitated campaign<br>1 – leadership engaged in and publically voice support for vaccination campaign OR described as being |



|       |      |    |      | based efforts previously<br>1 – Combination of sanction and incentive-based measures used prior to current intervention                                                                                                   |                                                                                                                                                                                                            |                                                                                                                                                            |                      | public display of vaccination status           |                                                                                                                                         | instrumental for success |
|-------|------|----|------|---------------------------------------------------------------------------------------------------------------------------------------------------------------------------------------------------------------------------|------------------------------------------------------------------------------------------------------------------------------------------------------------------------------------------------------------|------------------------------------------------------------------------------------------------------------------------------------------------------------|----------------------|------------------------------------------------|-----------------------------------------------------------------------------------------------------------------------------------------|--------------------------|
| Awali | 0.35 | 93 | 0.33 | Value: 0.33;<br>Previous efforts were sanction based only “During the next season (2010-2011), the institutional vaccination policy was not strictly mandatory; however, all unvaccinated employees were required to wear | Value: 0; “The reluctance of some HCP at our hospital to receive the influenza vaccine despite the mandatory vaccination policy most likely reflects misperceptions and poor knowledge of the benefits and | Value: 0.66;<br>Managers monitored compliance “The OHS and HCP’s direct supervisors or managers are responsible for ensuring compliance with this policy.” | Value 0; No evidence | Value 0; No evidence of stigmatising processes | Value 0; “...a cross-sectional survey research study was conducted at an urban tertiary care hospital in the metropolitan Detroit area” | Value 0; not stated      |

|         |      |      |   |                                                                                                                                                                                                                                                                                                   |                                                                                                                                                                                                                                                                                                    |                                                                   |                                                                                                                                                        |                                                                         |                                                                                                                                                                                                                    |                                                                                                                                                                                                                                                                              |
|---------|------|------|---|---------------------------------------------------------------------------------------------------------------------------------------------------------------------------------------------------------------------------------------------------------------------------------------------------|----------------------------------------------------------------------------------------------------------------------------------------------------------------------------------------------------------------------------------------------------------------------------------------------------|-------------------------------------------------------------------|--------------------------------------------------------------------------------------------------------------------------------------------------------|-------------------------------------------------------------------------|--------------------------------------------------------------------------------------------------------------------------------------------------------------------------------------------------------------------|------------------------------------------------------------------------------------------------------------------------------------------------------------------------------------------------------------------------------------------------------------------------------|
|         |      |      |   | masks when within 6 feet of all patient contacts.”                                                                                                                                                                                                                                                | risks of the vaccine.<br>“                                                                                                                                                                                                                                                                         |                                                                   |                                                                                                                                                        |                                                                         |                                                                                                                                                                                                                    |                                                                                                                                                                                                                                                                              |
| Babcock | 0.06 | 98.4 | 1 | Value: 1; Non-sanction based campaigns initially before accountability-based measures imposed: “free vaccine available at multiple sites and times, extensive publicity, incentives and educational programs, and more recently, declination statements..... In 2007, influenza vaccination rates | Value: 1; “Key factors that supported the success of the program included consistent communication emphasizing patient safety and quality of care, coordinated campaigns, leadership support, and medical director support to talk with any employee with concerns about the vaccine, on request.” | Value: 0; No specific enforcement or data on compliance collected | Value 0.66; Ad hoc interactions: “Managers interacted with their staff to ascertain reasons for noncompliance and to provide coaching about influenza” | Value 0; No evidence of stigmatising processes; encouraged to wear mask | Value 0.66; “Facilities include 11 acute care hospitals and 3 extended care facilities, as well as day care centers, employed physician groups, occupational medicine, home care, and behavioral health services.” | Value 1; “The CEO of BJC published a letter in the BJC newspaper explaining the rationale for the policy. The multidisciplinary implementation team met regularly before and during the vaccination campaign to ensure timely, consistent, and coordinated communication and |

|              |             |           |             |                                                                                                                                                                                                           |                                                                                                                                                                                 |                                                                                                                                                                             |                             |                                                                                                                                                                                           |                                                                                                                                                                                  |                                                                                                                                                                    |
|--------------|-------------|-----------|-------------|-----------------------------------------------------------------------------------------------------------------------------------------------------------------------------------------------------------|---------------------------------------------------------------------------------------------------------------------------------------------------------------------------------|-----------------------------------------------------------------------------------------------------------------------------------------------------------------------------|-----------------------------|-------------------------------------------------------------------------------------------------------------------------------------------------------------------------------------------|----------------------------------------------------------------------------------------------------------------------------------------------------------------------------------|--------------------------------------------------------------------------------------------------------------------------------------------------------------------|
|              |             |           |             | were added to the BJC patient safety and quality scorecard used at all hospitals in the organization..... In 2008, BJC HealthCare implemented a mandatory influenza vaccination policy for all employees” |                                                                                                                                                                                 |                                                                                                                                                                             |                             |                                                                                                                                                                                           |                                                                                                                                                                                  | responses to any issues that arose.”                                                                                                                               |
| <b>Drees</b> | <b>0.24</b> | <b>92</b> | <b>0.66</b> | <b>Value: 1;</b> Non-sanction based campaigns initially escalating to other forms of mandates/sanctions : “[the] vaccination campaign included promotional materials, web-                                | <b>Value: 1;</b> from supplementary materials, the communication campaign included: “Launched internal flu website with explanation of new program, frequently asked questions, | <b>Value: 0.66;</b> Managers monitored compliance “Beginning 2 weeks after the start of the campaign, every manager and vice president in the system began receiving weekly | <b>Value 0;</b> No evidence | <b>Value 1;</b> After vaccination (or attesting vaccination elsewhere), HCP were given hanging badges, stating “I’m vaccinated because I care,” to wear with their regular identification | <b>Value 0.33;</b> “Christiana Care Health System is a 2-hospital, 1,100-bed, private, not-for-profit, community-based academic healthcare system located in northern Delaware.” | <b>Value 0.66;</b> At each entrance, volunteer “clerks” (who ranged from administrative assistants to leadership personnel) scanned the HCP’s identification badge |

|  |  |  |  |                                                                                                                                                                                                                                                                                                                                                                            |                                                                                                                |                                                                                          |  |                                                                                                                                                                                                   |                                                                                                                                                                                                                                                                                                                                           |
|--|--|--|--|----------------------------------------------------------------------------------------------------------------------------------------------------------------------------------------------------------------------------------------------------------------------------------------------------------------------------------------------------------------------------|----------------------------------------------------------------------------------------------------------------|------------------------------------------------------------------------------------------|--|---------------------------------------------------------------------------------------------------------------------------------------------------------------------------------------------------|-------------------------------------------------------------------------------------------------------------------------------------------------------------------------------------------------------------------------------------------------------------------------------------------------------------------------------------------|
|  |  |  |  | <p>based and in-person education, free vaccination for employees and medical-dental staff, roving vaccinators...During the 2009 H1N1 pandemic, the health system created a policy that required explicit declination by all employees as well as the wearing of surgical masks....However, the policy did not include provisions to enforce either of these measures.”</p> | <p>multiple resources and links to external sources; Web-based education (non-mandatory) to all employees”</p> | <p>lists of their employees, notated as vaccinated, not vaccinated, or no response.”</p> |  | <p>badges. Wearing the tag was not mandatory, but anyone not wearing an “I’m vaccinated” tag was required to mask while in patient care areas, regardless of their actual vaccination status.</p> | <p>and the appropriate form (taking ~30 seconds), and then directed him/her to the next available vaccinator (volunteer nurses and pharmacists). ... Health system leadership approved use of the employee influenza vaccination rate as 1 of 3 metrics comprising a pre-existing employee bonus program, known as the Transformation</p> |
|--|--|--|--|----------------------------------------------------------------------------------------------------------------------------------------------------------------------------------------------------------------------------------------------------------------------------------------------------------------------------------------------------------------------------|----------------------------------------------------------------------------------------------------------------|------------------------------------------------------------------------------------------|--|---------------------------------------------------------------------------------------------------------------------------------------------------------------------------------------------------|-------------------------------------------------------------------------------------------------------------------------------------------------------------------------------------------------------------------------------------------------------------------------------------------------------------------------------------------|

|                |             |           |             |                                                                                                                                                                                                                                                                                                                                       |                                                                                                                                                                                                                                                                               |                                                                                                                                                                                                                                                           |                             |                                                                                                                                                                              |                                                                                                                                                                              |                                                                                                                                                                                      |
|----------------|-------------|-----------|-------------|---------------------------------------------------------------------------------------------------------------------------------------------------------------------------------------------------------------------------------------------------------------------------------------------------------------------------------------|-------------------------------------------------------------------------------------------------------------------------------------------------------------------------------------------------------------------------------------------------------------------------------|-----------------------------------------------------------------------------------------------------------------------------------------------------------------------------------------------------------------------------------------------------------|-----------------------------|------------------------------------------------------------------------------------------------------------------------------------------------------------------------------|------------------------------------------------------------------------------------------------------------------------------------------------------------------------------|--------------------------------------------------------------------------------------------------------------------------------------------------------------------------------------|
|                |             |           |             |                                                                                                                                                                                                                                                                                                                                       |                                                                                                                                                                                                                                                                               |                                                                                                                                                                                                                                                           |                             |                                                                                                                                                                              |                                                                                                                                                                              | Rewards Program (TRP).                                                                                                                                                               |
| <b>Frenzel</b> | <b>0.21</b> | <b>94</b> | <b>0.66</b> | <b>Value: 1;</b> Non-sanction based campaigns initially before mandatory: “the employee influenza vaccination program consisted of large, on-site influenza vaccination clinics that were distributed throughout >20 geographically dispersed patient care areas and research and administration buildings and were supplemented by 1 | <b>Value: 1;</b> “We expanded our education and communication campaign by prominently advertising the expanded clinic schedule and centralized, hospital-based locations and distributing various educational materials on the safety and efficacy of influenza vaccination.” | <b>Value: 0.66;</b> Managers monitored compliance “Compliance with mask use for unvaccinated HCWs was the responsibility of supervisors in each clinical area and was documented in a vaccine preventable diseases policy compliance-monitoring database” | <b>Value 0;</b> No evidence | <b>Value 0.66;</b> “compliance stickers also promoted positive reinforcement from co-workers and patients who perceived vaccination as an important patient safety measure.” | <b>Value 0.33;</b> “The University of Texas MD Anderson Cancer Center is a 656-bed National Cancer Institute–designated comprehensive cancer center with >19,000 employees.” | <b>Value 1;</b> “Senior leadership supported our initiative by aligning institutional goals with the 2007 Joint Commission requirement to increase HCW influenza vaccination rates.” |

|                     |             |           |             |                                                                                                                                                                                                                                        |                                                                                                  |                                                                                                                                                    |                                    |                                                                                             |                                                                                                                                                |                                   |
|---------------------|-------------|-----------|-------------|----------------------------------------------------------------------------------------------------------------------------------------------------------------------------------------------------------------------------------------|--------------------------------------------------------------------------------------------------|----------------------------------------------------------------------------------------------------------------------------------------------------|------------------------------------|---------------------------------------------------------------------------------------------|------------------------------------------------------------------------------------------------------------------------------------------------|-----------------------------------|
|                     |             |           |             | <p>week of roaming vaccination services via mobile carts... in 2009, we piloted the mandatory participation influenza prevention program, which targeted HCWs in high-risk areas and in the nursing staff as subsequently defined”</p> |                                                                                                  |                                                                                                                                                    |                                    |                                                                                             |                                                                                                                                                |                                   |
| <b>Ksienski (a)</b> | <b>0.44</b> | <b>74</b> | <b>0.33</b> | <p><b>Value: 0;</b> No evidence of activity before hard mandate imposed</p>                                                                                                                                                            | <p><b>Value 0;</b> No evidence of substantial education measures alongside punitive measures</p> | <p><b>Value: 1;</b> Employees encouraged to inform on one another “HCWs who witness any colleagues violating the Policy are required to report</p> | <p><b>Value 0;</b> No evidence</p> | <p><b>Value 0.66;</b> Green dot stickers used to publically indicate vaccination status</p> | <p><b>Value 1;</b> “province-wide Influenza Prevention Policy, whose primary objective is to increase vaccination coverage rates of HCWs.”</p> | <p><b>Value 0;</b> not stated</p> |

|                                 |             |             |             |                                                                      |                                                                                                        |                                                                                                                                                                               |                             |                                                                                      |                                                                                                                                                                                  |                            |
|---------------------------------|-------------|-------------|-------------|----------------------------------------------------------------------|--------------------------------------------------------------------------------------------------------|-------------------------------------------------------------------------------------------------------------------------------------------------------------------------------|-----------------------------|--------------------------------------------------------------------------------------|----------------------------------------------------------------------------------------------------------------------------------------------------------------------------------|----------------------------|
|                                 |             |             |             |                                                                      |                                                                                                        | the incident to their supervisor”                                                                                                                                             |                             |                                                                                      |                                                                                                                                                                                  |                            |
| <b>Ksienski<br/>(b)</b>         | <b>0.57</b> | <b>75</b>   | <b>0.33</b> | <b>Value: 0;</b> No evidence of activity before hard mandate imposed | <b>Value 0;</b> No evidence of substantial education measures alongside punitive measures              | <b>Value: 1;</b> Employees encouraged to inform on one another “HCWs who witness any colleagues violating the Policy are required to report the incident to their supervisor” | <b>Value 0;</b> No evidence | <b>Value 0.66;</b> Green dot stickers used to publically indicate vaccination status | <b>Value 1;</b> “province-wide Influenza Prevention Policy, whose primary objective is to increase vaccination coverage rates of HCWs.”                                          | <b>Value 0;</b> not stated |
| <b>Leibu<br/>and<br/>Maslow</b> | <b>0.22</b> | <b>94.7</b> | <b>0.66</b> | <b>Value: 0;</b> No evidence of activity before hard mandate imposed | <b>Value 0;</b> No evidence of substantial educational activities that could address employee concerns | <b>Value: 0;</b> No evidence                                                                                                                                                  | <b>Value 0;</b> No evidence | <b>Value 0;</b> Nothing mentioned                                                    | <b>Value 0.66;</b> “AHS comprised three acute care adult hospitals, a children’s hospital, an inpatient rehabilitation hospital, home care, transportation services, and several | <b>Value 0;</b> not stated |

|                           |             |           |             |                                                                                                                                                                                                                                                                                                                                 |                                                                                                                                               |                                                                                                                                                                                                     |                             |                                                                                                              |                                                                                          |                                                                   |
|---------------------------|-------------|-----------|-------------|---------------------------------------------------------------------------------------------------------------------------------------------------------------------------------------------------------------------------------------------------------------------------------------------------------------------------------|-----------------------------------------------------------------------------------------------------------------------------------------------|-----------------------------------------------------------------------------------------------------------------------------------------------------------------------------------------------------|-----------------------------|--------------------------------------------------------------------------------------------------------------|------------------------------------------------------------------------------------------|-------------------------------------------------------------------|
|                           |             |           |             |                                                                                                                                                                                                                                                                                                                                 |                                                                                                                                               |                                                                                                                                                                                                     |                             |                                                                                                              | off-site clinical office practices including diagnostic facilities.”                     |                                                                   |
| <b>Podscer<br/>vinski</b> | <b>0.42</b> | <b>96</b> | <b>0.33</b> | <b>Value: 1;</b> Non-sanction based campaigns initially before mandatory measures (note different intervention strategies had been implemented – evidence of one provided): “vaccine availability was advertised via multiple modalities at the center, including; mass emails, newsletter articles, and intranet postings. All | <b>Value 0;</b> Education only followed after declination as a penalty: “required decliners to complete enhanced influenza vaccine education” | <b>Value: 0.66;</b> Managers monitored compliance “Staff that did not meet campaign deadlines by either receiving or declining the vaccination were required to meet with their respective manager” | <b>Value 0;</b> No evidence | <b>Value 0.33;</b> In-person declination process “in front of occupation health, infection prevention staff” | <b>Value 0;</b> “The study was performed at a large comprehensive cancer care center...” | <b>Value 1;</b> “Center leadership support/involvement” described |



|               |             |             |          |                                                                                                                                                                                                                    |                                                                                                                                                                                     |                                                               |                             |                                   |                                                                                                                                                                                             |                                                                                                                                                             |
|---------------|-------------|-------------|----------|--------------------------------------------------------------------------------------------------------------------------------------------------------------------------------------------------------------------|-------------------------------------------------------------------------------------------------------------------------------------------------------------------------------------|---------------------------------------------------------------|-----------------------------|-----------------------------------|---------------------------------------------------------------------------------------------------------------------------------------------------------------------------------------------|-------------------------------------------------------------------------------------------------------------------------------------------------------------|
|               |             |             |          | employees were required to either be vaccinated or to complete a one-page signed declination form acknowledging that they understood the risks of declining the vaccine in a setting with such high-risk patients” |                                                                                                                                                                                     |                                                               |                             |                                   |                                                                                                                                                                                             |                                                                                                                                                             |
| <b>Rakita</b> | <b>0.05</b> | <b>98.9</b> | <b>1</b> | <b>Value: 0.66;</b> Non-sanction based campaigns initially before mandatory measures (note different intervention strategies had been implemented –                                                                | <b>Value 1;</b> “In the spring of 2005, multiple focus groups of staff and managers were created to gather data on the barriers, educational deficits, and preferences in receiving | <b>Value: 0;</b> No evidence as a policy across all employees | <b>Value 0;</b> No evidence | <b>Value 0;</b> Nothing mentioned | <b>Value 0.66;</b> “a tertiary care, multispecialty medical center that includes a 336-bed hospital, adjoining outpatient clinics, 7 regional clinics, and a research center, that provides | <b>Value 1;</b> Intervention included “meetings with staff and leadership to answer questions; grand rounds speakers; trained advocates, or “champions,” of |

|              |             |             |          |                                                                                                                                                                                                              |                                                                                                                                                      |                                                                                                                                                                 |                                                                                                                                                                                                                       |                                   |                                                                                                                                                                                                                                     |                                                                                                                                             |
|--------------|-------------|-------------|----------|--------------------------------------------------------------------------------------------------------------------------------------------------------------------------------------------------------------|------------------------------------------------------------------------------------------------------------------------------------------------------|-----------------------------------------------------------------------------------------------------------------------------------------------------------------|-----------------------------------------------------------------------------------------------------------------------------------------------------------------------------------------------------------------------|-----------------------------------|-------------------------------------------------------------------------------------------------------------------------------------------------------------------------------------------------------------------------------------|---------------------------------------------------------------------------------------------------------------------------------------------|
|              |             |             |          | evidence of one provided): “vaccine                                                                                                                                                                          | information with regard to vaccinations. The campaign was organized around the information gathered during these focus-group sessions.”              |                                                                                                                                                                 |                                                                                                                                                                                                                       |                                   | residency teaching programs, and that employs approximately 400 physicians and a total of approximately 5,000 HCWs.”                                                                                                                | influenza vaccination; and one-on-one meetings with concerned staff. These champions included the president and CEO of the medical center.” |
| <b>Smith</b> | <b>0.08</b> | <b>97.7</b> | <b>1</b> | <b>Value: 0.66;</b> Non-sanction based campaigns initially before mandatory measures: During 2009 pandemic, prior to 2011 mandates, the hospital “engaged in unprecedented community and internal publicity, | <b>Value 1;</b> “engaged in unprecedented community and internal publicity, education, and other efforts to improve HCW influenza vaccination rates” | <b>Value: 0.66;</b> Managers monitored compliance “Managers were responsible for monitoring the vaccination/exempti on status of employees in their department” | <b>Value 0;</b> No structured process for encouraging interactions invited: “Aurora has a formal process for measuring HCW job satisfaction, but the process did not include questions about the vaccination policy.” | <b>Value 0;</b> Nothing mentioned | <b>Value 0.66;</b> “Aurora Health Care (Aurora) is a large integrated delivery system in eastern Wisconsin/northern Illinois that serves over 1.2 million patients per year and has over 30,000 employees...BJC Healthcare, a large | <b>Value 1</b> “Senior leadership support was critical to the program’s success and its continuation.”                                      |

|               |             |             |          |                                                                                                                                                                                                                                                                                                |                                                                     |                              |                                                                                                               |                                   |                                                                                                                                                                                                                                                                                |                                                   |
|---------------|-------------|-------------|----------|------------------------------------------------------------------------------------------------------------------------------------------------------------------------------------------------------------------------------------------------------------------------------------------------|---------------------------------------------------------------------|------------------------------|---------------------------------------------------------------------------------------------------------------|-----------------------------------|--------------------------------------------------------------------------------------------------------------------------------------------------------------------------------------------------------------------------------------------------------------------------------|---------------------------------------------------|
|               |             |             |          | education, and other efforts to improve HCW influenza vaccination rates”                                                                                                                                                                                                                       |                                                                     |                              |                                                                                                               |                                   | Midwestern health care organization similar in size and revenue to Aurora”                                                                                                                                                                                                     |                                                   |
| <b>Stuart</b> | <b>0.14</b> | <b>92.8</b> | <b>1</b> | <b>Value: 1;</b> Incentive-based programme implemented before a sanction-based programme was trialled before hard mandate intervention: “The program is free and incorporates mobile rounds, extended hours and promotion via newsletters and announcements. .... In December 2012, the DN was | <b>Value 0;</b> “No evidence of substantial educational activities” | <b>Value: 0;</b> No evidence | <b>Value 1;</b> “Staff were given the opportunity to ask questions about the program and raise any concerns.” | <b>Value 0;</b> Nothing mentioned | <b>Value 0.33;</b> “Monash Health is a tertiary referral service in Melbourne, Australia, with 2200 beds and 13 389 HCWs. The service provides for 1.3 million residents.” Note intervention described as being carried out in one department; unclear how many HCWs involved. | <b>Value 1;</b> Senior leaders on authorship team |

|  |  |  |  |                                                                                                                                                                                                                                                                                                                                                                                                              |  |  |  |  |  |  |
|--|--|--|--|--------------------------------------------------------------------------------------------------------------------------------------------------------------------------------------------------------------------------------------------------------------------------------------------------------------------------------------------------------------------------------------------------------------|--|--|--|--|--|--|
|  |  |  |  | <p>informed that to increase influenza vaccination rates, unvaccinated HCWs would be asked to wear a surgical mask during patient care throughout the influenza season. Staff were given the opportunity to ask questions about the program and raise any concerns. In February 2013, a follow-up letter confirmed that the program would be enforced, and vaccination commenced in April 2013 (when the</p> |  |  |  |  |  |  |
|--|--|--|--|--------------------------------------------------------------------------------------------------------------------------------------------------------------------------------------------------------------------------------------------------------------------------------------------------------------------------------------------------------------------------------------------------------------|--|--|--|--|--|--|

|  |  |  |  |                            |  |  |  |  |  |  |
|--|--|--|--|----------------------------|--|--|--|--|--|--|
|  |  |  |  | vaccine became available). |  |  |  |  |  |  |
|--|--|--|--|----------------------------|--|--|--|--|--|--|

Soft mandate/other data table with evidence

|                |                   |                                                    |                          | <b>'Don't go in cold' (Have there been other previous vaccination campaigns prior to current intervention to change behaviours)</b> | <b>Was education provided to improve knowledge among HCW of vaccination benefits and risks?</b> | <b>Were Healthcare Workers encouraged to inform on others?</b>                                                 | <b>Two-way engagement/bidirectional communication</b>                                                   | <b>Stigma</b>                                                                           | <b>Area policies implemented across institutions</b>                                             | <b>Leading from the front – did senior staff engage in the campaign</b>                                           | <b>Letter</b>                                                                                    |
|----------------|-------------------|----------------------------------------------------|--------------------------|-------------------------------------------------------------------------------------------------------------------------------------|-------------------------------------------------------------------------------------------------|----------------------------------------------------------------------------------------------------------------|---------------------------------------------------------------------------------------------------------|-----------------------------------------------------------------------------------------|--------------------------------------------------------------------------------------------------|-------------------------------------------------------------------------------------------------------------------|--------------------------------------------------------------------------------------------------|
| <b>Studies</b> | <b>Risk Ratio</b> | <b>Percentage of HCWs vaccinated at the end of</b> | <b>Outcome set value</b> | <b>0 – No previous campaign or coordinated effort mentioned (vaccine may have been made available only)</b>                         | <b>0 – No education provided or education did not improve levels of knowledge</b>               | <b>1 – Employees encouraged to inform on colleagues<br/><br/>0 – No evidence of that employees expected to</b> | <b>0 - not stated<br/><br/>1 - formal processes for two way engagement established in the design or</b> | <b>0 – not stated<br/><br/>1 – public display of vaccination status enforced and/or</b> | <b>0 – single institution or modest number of institutions (&lt;20) and/or HCWs (&lt;10,000)</b> | <b>0 – not stated<br/><br/>1 – leadership engaged in and publically voice support for vaccination campaign OR</b> | <b>0 – Not a letter to the editor<br/><br/>1 – Letter to the editor with limited description</b> |

|                                                                                                  |          | interve<br>ntion |   | 1 – Sanction-<br>based or<br>accountability-<br>based efforts or<br>incentivisation<br>and health<br>promotion based<br>efforts or<br>combination                                                                                                          | 1 – Education<br>provided that<br>improved<br>knowledge of the<br>vaccine                    | inform or monitor<br>colleagues’<br>vaccination status | implementation of<br>the intervention | stigmatising<br>language                                | 1 – Area based<br>interventions<br>(e.g. health<br>authorities,<br>states or<br>counties)                           | described as<br>being<br>instrumental for<br>success |                                            |
|--------------------------------------------------------------------------------------------------|----------|------------------|---|------------------------------------------------------------------------------------------------------------------------------------------------------------------------------------------------------------------------------------------------------------|----------------------------------------------------------------------------------------------|--------------------------------------------------------|---------------------------------------|---------------------------------------------------------|---------------------------------------------------------------------------------------------------------------------|------------------------------------------------------|--------------------------------------------|
| Camara<br>go<br>(Note<br>quoted<br>text is<br>translat<br>ed<br>from<br>original<br>Spanish<br>) | 0.9<br>7 | 26.5%            | 0 | Value 0; value of 0<br>allocated because<br>previous year<br>activities<br>described as<br>business as usual:<br>“The objective of<br>this work is to<br>describe the<br>results obtained in<br>the vaccination<br>campaign against<br>influenza in health | Value 1;<br>“Information<br>leaflet contains -<br>Questions and<br>answers about the<br>flu” | Value: 0; No<br>evidence                               | Value 0; Nothing<br>stated            | Value 0; No<br>evidence of<br>stigmatising<br>processes | Value 0;<br>Observational<br>study in a tertiary<br>hospital with a<br>staff of<br>approximately<br>3,100 workers.” | Value 0; Not<br>stated                               | Value 0 – Not a<br>letter to the<br>editor |

|                                 |             |              |          |                                                                                                                                                                                              |                                                                                                                                                        |                              |                                                                                                                                   |                                                       |                                                                     |                                                                             |                                             |
|---------------------------------|-------------|--------------|----------|----------------------------------------------------------------------------------------------------------------------------------------------------------------------------------------------|--------------------------------------------------------------------------------------------------------------------------------------------------------|------------------------------|-----------------------------------------------------------------------------------------------------------------------------------|-------------------------------------------------------|---------------------------------------------------------------------|-----------------------------------------------------------------------------|---------------------------------------------|
|                                 |             |              |          | personnel of the season 2011-2012, in which the measures to achieve coverage, and compare them with the results of the campaign 2010-2011, which was carried out with the usual strategies.” |                                                                                                                                                        |                              |                                                                                                                                   |                                                       |                                                                     |                                                                             |                                             |
| <b>Dey (Primary Care Teams)</b> | <b>0.99</b> | <b>21.9%</b> | <b>0</b> | <b>Value 0;</b> No evidence presented                                                                                                                                                        | <b>Value 1;</b> “The offer was made in a letter from the Consultant in Communicable Disease Control, which set out the benefits of vaccination...staff | <b>Value: 0;</b> No evidence | <b>Value 1;</b> Visits by nurse educator provided opportunity for two way engagement “Visited by a public health nurse who raised | <b>Value 0;</b> No evidence of stigmatising processes | <b>Value 1;</b> All worksites in a Health Authority were randomised | <b>Value 0;</b> No clear evidence of leadership practices being implemented | <b>Value 0 – Not a letter to the editor</b> |

|                       |          |       |   |                                |                                                                                                                                                                                                                                                                                                         |                       |                                                                                                                                                                                                                                                        |                         |                             |                                          |                                      |
|-----------------------|----------|-------|---|--------------------------------|---------------------------------------------------------------------------------------------------------------------------------------------------------------------------------------------------------------------------------------------------------------------------------------------------------|-----------------------|--------------------------------------------------------------------------------------------------------------------------------------------------------------------------------------------------------------------------------------------------------|-------------------------|-----------------------------|------------------------------------------|--------------------------------------|
|                       |          |       |   |                                | were visited by a public health nurse who raised awareness of the campaign, emphasized the safety and efficacy of the vaccination, outlined possible side effects and contraindications, discussed the impact of influenza on absenteeism, and attempted to ally anxieties and correct misconceptions.” |                       | awareness of the campaign, emphasized the safety and efficacy of the vaccination, outlined possible side effects and contraindications, discussed the impact of influenza on absenteeism, and attempted to ally anxieties and correct misconceptions.” |                         |                             |                                          |                                      |
| Dey b<br>(Nursin<br>g | 0.9<br>5 | 10.2% | 0 | Value 0; No evidence presented | Value 1; “The offer was made in a letter from the                                                                                                                                                                                                                                                       | Value: 0; No evidence | Value 1; Visits by nurse educator provided                                                                                                                                                                                                             | Value 0; No evidence of | Value 1; All worksites in a | Value 0; No clear evidence of leadership | Value 0 – Not a letter to the editor |



|            |  |  |  |  |                                                                                                                                                                                                                                                                                                                                                                                     |  |                                                                                                                                                                                                                                                                                                                                                   |                               |                                         |                                    |  |
|------------|--|--|--|--|-------------------------------------------------------------------------------------------------------------------------------------------------------------------------------------------------------------------------------------------------------------------------------------------------------------------------------------------------------------------------------------|--|---------------------------------------------------------------------------------------------------------------------------------------------------------------------------------------------------------------------------------------------------------------------------------------------------------------------------------------------------|-------------------------------|-----------------------------------------|------------------------------------|--|
| Homes<br>) |  |  |  |  | <p>Consultant in Communicable Disease Control, which set out the benefits of vaccination...staff were visited by a public health nurse who raised awareness of the campaign, emphasized the safety and efficacy of the vaccination, outlined possible side effects and contraindications, discussed the impact of influenza on absenteeism, and attempted to ally anxieties and</p> |  | <p>opportunity for two way engagement<br/>"Visited by a public health nurse who raised awareness of the campaign, emphasized the safety and efficacy of the vaccination, outlined possible side effects and contraindications, discussed the impact of influenza on absenteeism, and attempted to ally anxieties and correct misconceptions."</p> | <p>stigmatising processes</p> | <p>Health Authority were randomised</p> | <p>practices being implemented</p> |  |
|------------|--|--|--|--|-------------------------------------------------------------------------------------------------------------------------------------------------------------------------------------------------------------------------------------------------------------------------------------------------------------------------------------------------------------------------------------|--|---------------------------------------------------------------------------------------------------------------------------------------------------------------------------------------------------------------------------------------------------------------------------------------------------------------------------------------------------|-------------------------------|-----------------------------------------|------------------------------------|--|

|                     |      |     |   |                                                                                                                                                                                                                                                                               |                                                                                                                                                                                                                                                                                                 |                       |                                                                                                      |                                                |                                                                                                                                                              |                                                                                                           |                                      |
|---------------------|------|-----|---|-------------------------------------------------------------------------------------------------------------------------------------------------------------------------------------------------------------------------------------------------------------------------------|-------------------------------------------------------------------------------------------------------------------------------------------------------------------------------------------------------------------------------------------------------------------------------------------------|-----------------------|------------------------------------------------------------------------------------------------------|------------------------------------------------|--------------------------------------------------------------------------------------------------------------------------------------------------------------|-----------------------------------------------------------------------------------------------------------|--------------------------------------|
|                     |      |     |   |                                                                                                                                                                                                                                                                               | correct misconceptions.”                                                                                                                                                                                                                                                                        |                       |                                                                                                      |                                                |                                                                                                                                                              |                                                                                                           |                                      |
| Dorato raj (letter) | 0.98 | 39% | 0 | Value 1; Previous efforts described: “usual multi-factored approach (e.g., educational posters, newsletters, t-shirts, buttons, department meetings, and open access for long hours at multiple influenza shot stations), which had been successfully used in previous years” | Value 1; In addition to “no additional intervention beyond the usual multi-factored approach (e.g., educational posters, newsletters, t-shirts, buttons, department meetings, and open access for long hours at multiple influenza shot stations), which had been successfully used in previous | Value: 0; No evidence | Value 0; department meetings - but not specifically about intervention and part of control condition | Value 0; No evidence of stigmatising processes | Value 0; “Eligible study participants consisted of 6723 physicians and nurses with predominantly direct patient contact at an urban tertiary care hospital.” | Value 0; No clear evidence of leadership practices being implemented beyond a logo included on the letter | Value 0 – Not a letter to the editor |

|                         |      |     |   |                                                                                                                                                                                     |                                                                                                                                                                                   |                       |                                                                                                      |                                                |                                                                                                                                                              |                                                                      |                                      |
|-------------------------|------|-----|---|-------------------------------------------------------------------------------------------------------------------------------------------------------------------------------------|-----------------------------------------------------------------------------------------------------------------------------------------------------------------------------------|-----------------------|------------------------------------------------------------------------------------------------------|------------------------------------------------|--------------------------------------------------------------------------------------------------------------------------------------------------------------|----------------------------------------------------------------------|--------------------------------------|
|                         |      |     |   |                                                                                                                                                                                     | years;" the intervention included "an influenza vaccine educational letter with the hospital logo from the head of infectious diseases"                                           |                       |                                                                                                      |                                                |                                                                                                                                                              |                                                                      |                                      |
| Dorato raj (incentives) | 0.95 | 42% | 0 | Value 1; Previous efforts described: "usual multifactored approach (eg, educational posters, newsletters, t-shirts, buttons, department meetings, and open access for long hours at | Value 0; "In addition to no additional intervention beyond the usual multi-factored approach (e.g., educational posters, newsletters, t-shirts, buttons, department meetings, and | Value: 0; No evidence | Value 0; department meetings - but not specifically about intervention and part of control condition | Value 0; No evidence of stigmatising processes | Value 0; "Eligible study participants consisted of 6723 physicians and nurses with predominantly direct patient contact at an urban tertiary care hospital." | Value 0; No clear evidence of leadership practices being implemented | Value 0 – Not a letter to the editor |

|  |  |  |                                                                                        |                                                                                                                                                                                                                                                                                        |  |  |  |  |  |  |
|--|--|--|----------------------------------------------------------------------------------------|----------------------------------------------------------------------------------------------------------------------------------------------------------------------------------------------------------------------------------------------------------------------------------------|--|--|--|--|--|--|
|  |  |  | multiple influenza shot stations), which had been successfully used in previous years” | open access for long hours at multiple influenza shot stations), which had been successfully used in previous year” the intervention included “a palm tree-decorated raffle ticket offer to win a \$3000 Caribbean vacation for 2, with documentation of receiving influenza vaccine.” |  |  |  |  |  |  |
|--|--|--|----------------------------------------------------------------------------------------|----------------------------------------------------------------------------------------------------------------------------------------------------------------------------------------------------------------------------------------------------------------------------------------|--|--|--|--|--|--|

|                |      |       |   |                                                                                                                                 |                                                                                                                                    |                                                                                                                                                   |                                                                         |                                                                                                                                                                         |                                                                                                                                                            |                                                                                                                                                                             |                                            |
|----------------|------|-------|---|---------------------------------------------------------------------------------------------------------------------------------|------------------------------------------------------------------------------------------------------------------------------------|---------------------------------------------------------------------------------------------------------------------------------------------------|-------------------------------------------------------------------------|-------------------------------------------------------------------------------------------------------------------------------------------------------------------------|------------------------------------------------------------------------------------------------------------------------------------------------------------|-----------------------------------------------------------------------------------------------------------------------------------------------------------------------------|--------------------------------------------|
| Guanche Garcel | 0.24 | 93.2% | 1 | <b>Value 1;</b><br>“compared with the previous campaign (2013–2014), the new interventions...”                                  | <b>Value 1;</b> “Group educational sessions were conducted before the initiation of the campaign.”                                 | <b>Value 0; No evidence</b>                                                                                                                       | <b>Value 1;</b> Group educational sessions (implies opportunity)        | <b>Value 0;</b> No evidence of stigmatising processes                                                                                                                   | <b>Value 0;</b> “At the Cuban Hospital, Dukhan, Qatar, a 75-bed secondary care center”                                                                     | <b>Value 1;</b> “During our intervention, we received the full commitment of the leaders and heads of departments; that was an important advantage to achieve the results.” | <b>Value 1:</b> Letter with data           |
| Heinrich       | 0.45 | 80.3% | 1 | <b>Value 1;</b><br>“Annually, mass vaccination days are held at each campus and are supported by mobile immunisation services.” | <b>Value 1;</b><br>“Information regarding staff influenza vaccination sessions was provided in weekly electronic communiqués ....” | <b>Value 1;</b> “On a weekly basis, names of those staff yet to declare their intention for influenza vaccination were extracted and submitted to | <b>Value 1;</b> “various hospital-wide meetings.” (implies opportunity) | <b>Value 1;</b> “A small campaign sticker was developed for placement on staff identification badges of vaccinated HCWs so that nurse immunisers could quickly identify | <b>Value 0;</b> “Alfred Health is a tertiary referral health service in Melbourne, Australia with approximately 7000 staff employed across three campuses” | <b>Value 1;</b> “feature of our infection prevention activities is the strong support of senior hospital executive and senior medical staff.”                               | <b>Value 0:</b> Research article published |

|       |          |  |   |                                                                                                                                                             |                                                                                                  |                                      |                                                                                                                                                                        |                                                          |                                                                                                           |                                                                                                                                                                                                                                                          |                                            |
|-------|----------|--|---|-------------------------------------------------------------------------------------------------------------------------------------------------------------|--------------------------------------------------------------------------------------------------|--------------------------------------|------------------------------------------------------------------------------------------------------------------------------------------------------------------------|----------------------------------------------------------|-----------------------------------------------------------------------------------------------------------|----------------------------------------------------------------------------------------------------------------------------------------------------------------------------------------------------------------------------------------------------------|--------------------------------------------|
|       |          |  |   |                                                                                                                                                             |                                                                                                  | managers so they could prompt staff” |                                                                                                                                                                        | those staff who had already received influenza vaccine.” |                                                                                                           |                                                                                                                                                                                                                                                          |                                            |
| Honda | 0.2<br>4 |  | 1 | <b>Value 1;</b> Influenza Vaccination Strategies before soft mandate intervention “Before this intervention, influenza vaccination for HCWs was voluntary.” | <b>Value 0;</b> None stated - purely information about campaign - not justification for campaign | <b>Value: 0; No evidence</b>         | <b>Value 1;</b> “HCWs who submitted the declination form without documenting the primary reason were contacted by phone to obtain their reasons” (implies opportunity) | <b>Value 0;</b> No evidence of stigmatising processes    | <b>Value 0;</b> Healthcare workers at a 550-bed, tertiary care, academic medical center in Sapporo, Japan | <b>Value 1;</b> Reflections from authors: “Implementing these strategies, however, required strong leadership at the institutional level, with increased recognition of the importance of vaccination of HCWs by the institution and financial support.” | <b>Value 0:</b> Research article published |

|               |      |       |   |                                                                                                                                                                               |                                                                                                                                                                           |                              |                                                                                                                              |                                                       |                                                                                                                         |                                                                                                                                            |                                            |
|---------------|------|-------|---|-------------------------------------------------------------------------------------------------------------------------------------------------------------------------------|---------------------------------------------------------------------------------------------------------------------------------------------------------------------------|------------------------------|------------------------------------------------------------------------------------------------------------------------------|-------------------------------------------------------|-------------------------------------------------------------------------------------------------------------------------|--------------------------------------------------------------------------------------------------------------------------------------------|--------------------------------------------|
| Lavela        | 0.49 | 77.4% | 1 | <b>Value 1;</b> Study described a number of pre-implementation measures taken to ensure the design of the intervention was reflective of input from key stakeholders          | <b>Value 1;</b> "At each site, kick-off efforts included local informational sessions for HCWs"                                                                           | <b>Value: 0;</b> No evidence | <b>Value 1;</b> coordinators "met with SCI/D staff to describe the DFP and encourage participation." (implies opportunity)   | <b>Value 0;</b> No evidence of stigmatising processes | <b>Value 0;</b> Pilot intervention for "influenza vaccination of HCWs working at 2 VA spinal cord injury (SCI) centers" | <b>Value 1;</b> The intervention is described as being supported by leadership; local leadership met with staff to encourage participation | <b>Value 0:</b> Research article published |
| Leitme<br>yer | 0.96 | 26%   | 0 | <b>Value 0;</b> Baseline study conducted on reasons for low uptake but no activities that could influence implementation described e.g. building relationships or undertaking | <b>Value 1;</b> "The main activity of the campaign was a mass mailing to the hospitals' medical services of all German hospitals (n~2000), which included information and | <b>Value: 0;</b> No evidence | <b>Value 0;</b> Comms one way only "The main activity of the campaign was a mass mailing to the hospitals' medical services" | <b>Value 0;</b> No evidence of stigmatising processes | <b>Value 1;</b> A nationwide campaign in Germany                                                                        | <b>Value 0;</b> not stated                                                                                                                 | <b>Value 0:</b> Research article published |

|          |      |       |   |                                                                                                          |                                                                                                                                                                                                                          |                       |                                                                                |                                                |                                                                                                            |                                                                                                   |                                     |
|----------|------|-------|---|----------------------------------------------------------------------------------------------------------|--------------------------------------------------------------------------------------------------------------------------------------------------------------------------------------------------------------------------|-----------------------|--------------------------------------------------------------------------------|------------------------------------------------|------------------------------------------------------------------------------------------------------------|---------------------------------------------------------------------------------------------------|-------------------------------------|
|          |      |       |   | previous campaign.                                                                                       | training materials, such as a PowerPoint presentation for in-house education, posters, handouts, text suggestions for employee mailings and a list of suggested activities to increase influenza vaccination among HCW.” |                       |                                                                                |                                                |                                                                                                            |                                                                                                   |                                     |
| LeMaitre | 0.44 | 69.9% | 1 | Value 1; “In the intervention arm, a promotional campaign based on posters, leaflets, and an information | Value 1; “The campaign described the potential benefits of influenza vaccination for one’s own                                                                                                                           | Value: 0; No evidence | Value 1; Opportunities provided “Influenza vaccination was further recommended | Value 0; No evidence of stigmatising processes | Value 1; “Forty nursing homes matched for size, staff vaccination coverage during the previous season, and | Value 1; Permission sought from leaders of each Nursing Home indicating leadership commitment and | Value 0: Research article published |



|  |  |  |  |                                                                                                                                          |                                       |  |                                                                                                                                                                                                                                                                                                                                                          |  |                             |                                                                                                                                                                                                                                                                              |  |
|--|--|--|--|------------------------------------------------------------------------------------------------------------------------------------------|---------------------------------------|--|----------------------------------------------------------------------------------------------------------------------------------------------------------------------------------------------------------------------------------------------------------------------------------------------------------------------------------------------------------|--|-----------------------------|------------------------------------------------------------------------------------------------------------------------------------------------------------------------------------------------------------------------------------------------------------------------------|--|
|  |  |  |  | meeting with the study team between September 15 and October 31, 2006, first sensitized staff to the benefits of influenza vaccination.” | protection and that of the residents” |  | during face-to-face interviews with each member of staff present in the nursing homes between November 6 and December 15, 2006. The study team individually met all administrative staff, technicians, and caregivers to invite them to participate, and volunteers were vaccinated at the end of the interview. During the interview, prior vaccination |  | resident disability index.” | involvement “Each of these 376 nursing homes was sent a written invitation to participate, and 88 responded positively. Of these, 40 nursing homes in which the staff influenza vaccination coverage rate was less than 40% during the 2005/06 winter season were selected.” |  |
|--|--|--|--|------------------------------------------------------------------------------------------------------------------------------------------|---------------------------------------|--|----------------------------------------------------------------------------------------------------------------------------------------------------------------------------------------------------------------------------------------------------------------------------------------------------------------------------------------------------------|--|-----------------------------|------------------------------------------------------------------------------------------------------------------------------------------------------------------------------------------------------------------------------------------------------------------------------|--|

|       |          |     |   |                                                                                                                                                                                                                                                                    |                                                                                                                                                                                                                                     |                              |                                                                                  |                                                       |                                          |                                                                                                                           |                                  |
|-------|----------|-----|---|--------------------------------------------------------------------------------------------------------------------------------------------------------------------------------------------------------------------------------------------------------------------|-------------------------------------------------------------------------------------------------------------------------------------------------------------------------------------------------------------------------------------|------------------------------|----------------------------------------------------------------------------------|-------------------------------------------------------|------------------------------------------|---------------------------------------------------------------------------------------------------------------------------|----------------------------------|
|       |          |     |   |                                                                                                                                                                                                                                                                    |                                                                                                                                                                                                                                     |                              | status and, if appropriate, the reason for non-vaccination were also collected.” |                                                       |                                          |                                                                                                                           |                                  |
| Lopes | 0.5<br>9 | 45% | 1 | <b>Value 1;</b> “Since 1999, annual influenza vaccination has been offered free of charge to all HCWs at the hospital's Immunization Center during working hours. Under this strategy, 1,202 HCWs (6% of the target population) were vaccinated in 2004, and 1,292 | <b>Value 1;</b> Educational campaign and a vaccination campaign: “The educational campaign addressed influenza and emphasized the importance and safety of vaccination through lectures, informal handouts, fact sheets distributed | <b>Value: 0; No evidence</b> | <b>Value 0;</b> One-way communication only described                             | <b>Value 0;</b> No evidence of stigmatising processes | <b>Value 0;</b> Single hospital involved | <b>Value 1;</b> “Both the institutional commitment to improve the rates and the involvement of employees were essential.” | <b>Value 1:</b> Letter with data |

|        |      |       |   |                                                                                                                                                                                 |                                                                                                                                                                            |                       |                                                                                                                                                                                                                                                                                |                                                |                                                    |                                                                                                                                                                                                                                                              |                                     |
|--------|------|-------|---|---------------------------------------------------------------------------------------------------------------------------------------------------------------------------------|----------------------------------------------------------------------------------------------------------------------------------------------------------------------------|-----------------------|--------------------------------------------------------------------------------------------------------------------------------------------------------------------------------------------------------------------------------------------------------------------------------|------------------------------------------------|----------------------------------------------------|--------------------------------------------------------------------------------------------------------------------------------------------------------------------------------------------------------------------------------------------------------------|-------------------------------------|
|        |      |       |   | (6.5%) were vaccinated in 2005.”                                                                                                                                                | with employees' paychecks, and posters.”                                                                                                                                   |                       |                                                                                                                                                                                                                                                                                |                                                |                                                    |                                                                                                                                                                                                                                                              |                                     |
| Ribner | 0.59 | 66.5% | 1 | Value 1; “Before the 2006-2007 season, employees were encouraged to receive influenza vaccination, through the use of posters and articles in various employee communications.” | Value 1; In addition to promotional materials made available, the declination form also included a short statement that summarized the advantages of employee vaccination. | Value: 0; No evidence | Value 0; Although employees could voice concerns it wasn't clear how these we responded to “...the declination section of the form allowed employees to mark the reason(s) for declination of influenza vaccination. A blank space was available for employees to write in any | Value 0; No evidence of stigmatising processes | Value 0; “2 adult, tertiary care, urban hospitals” | Value 1; “Top management took a much more public stance in support of the program, supervisors were given weekly feedback on the participation of employees in their sections, and a very popular T-shirt was given to employees who received vaccinations.” | Value 0: Research article published |

|                                   |      |     |   |                                                                                                                             |                                                                                                                                                                                                                                                                                               |                              |                                                                                                                                                                                                                                                                                     |                                                       |                                           |                                                                                                                                                                                                                                                                                    |                                            |
|-----------------------------------|------|-----|---|-----------------------------------------------------------------------------------------------------------------------------|-----------------------------------------------------------------------------------------------------------------------------------------------------------------------------------------------------------------------------------------------------------------------------------------------|------------------------------|-------------------------------------------------------------------------------------------------------------------------------------------------------------------------------------------------------------------------------------------------------------------------------------|-------------------------------------------------------|-------------------------------------------|------------------------------------------------------------------------------------------------------------------------------------------------------------------------------------------------------------------------------------------------------------------------------------|--------------------------------------------|
|                                   |      |     |   |                                                                                                                             |                                                                                                                                                                                                                                                                                               |                              | reason(s) not preprinted on the form.”                                                                                                                                                                                                                                              |                                                       |                                           |                                                                                                                                                                                                                                                                                    |                                            |
| Rothan - Tondeur (Education only) | 0.97 | 34% | 0 | <b>Value 0;</b> The study reports on two intervention modes; the first is reported here with no preliminary steps described | <b>Value 1;</b> After understanding reasons for declining the vaccination among HCWs, the intervention involved providing “information that would clear up all their fears and doubts and develop their altruism (HCW flu vaccination having a beneficial effect on their elderly patients).” | <b>Value: 0;</b> No evidence | <b>Value 0;</b> Reasons for declination were incorporated into the intervention but no evidence that the intervention involved two-way dialogue. Educational sessions described in didactic ways and involve lengthy presentation slides rather than opportunities for question and | <b>Value 0;</b> No evidence of stigmatising processes | <b>Value 1:</b> “43 health care settings” | <b>Value 1;</b> Permission sought from leaders of each Nursing Home indicating leadership commitment and involvement “A call for participation was carried out in long-term care facilities and rehabilitation care units throughout France. Department heads wishing their HCS to | <b>Value 0:</b> Research article published |

|        |          |     |   |                                                                                           |                                                                                                    |                              |                                                                                                                                                                                                                                          |                                                       |                                                 |                                                                               |                                  |
|--------|----------|-----|---|-------------------------------------------------------------------------------------------|----------------------------------------------------------------------------------------------------|------------------------------|------------------------------------------------------------------------------------------------------------------------------------------------------------------------------------------------------------------------------------------|-------------------------------------------------------|-------------------------------------------------|-------------------------------------------------------------------------------|----------------------------------|
|        |          |     |   |                                                                                           |                                                                                                    |                              | answer: "The slide show, entitled "Myths and Reality about Flu Vaccination", was shown during the information sessions. The 52 slides were intended to expose myths to realities: for example, the myth that "the vaccine can cause flu" |                                                       |                                                 | participate in the study designated a local investigator and contacted ORIG." |                                  |
| Sadler | 0.0<br>6 | 97% | 1 | <b>Value 1;</b> Previous campaigns indicated "Despite successes of the outpatient vaccine | <b>Value 1;</b> "Targeted education interventions outlining survey findings along with benefits of | <b>Value: 0;</b> No evidence | <b>Value 1;</b> Interventions were targeted and responsive to staff concerns                                                                                                                                                             | <b>Value 0;</b> No evidence of stigmatising processes | <b>Value 0;</b> Single department in a hospital | <b>Value 0;</b> not stated                                                    | <b>Value 1:</b> Letter with data |

|  |  |  |                                                                                                                                                                                                                                                                                                                                                    |                                                                       |  |  |  |  |  |  |  |
|--|--|--|----------------------------------------------------------------------------------------------------------------------------------------------------------------------------------------------------------------------------------------------------------------------------------------------------------------------------------------------------|-----------------------------------------------------------------------|--|--|--|--|--|--|--|
|  |  |  | programme,<br>influenza vaccine<br>uptake in HCWs in<br>GUIDE in 2011-<br>2012 was only<br>52% (31/60). A<br>staff survey was<br>undertaken in<br>April 2012 to<br>investigate<br>reasons for poor<br>vaccine uptake.<br>Here we report<br>results of the<br>survey and<br>describe<br>interventions<br>employed to<br>improve vaccine<br>uptake.” | influenza vaccine<br>were undertaken<br>at departmental<br>meetings.” |  |  |  |  |  |  |  |
|--|--|--|----------------------------------------------------------------------------------------------------------------------------------------------------------------------------------------------------------------------------------------------------------------------------------------------------------------------------------------------------|-----------------------------------------------------------------------|--|--|--|--|--|--|--|

|         |      |     |   |                                                                                                                                                                                                                                                                        |                                                                                                                                                                               |                              |                                                                            |                                                       |                                            |                                                                                               |                                            |
|---------|------|-----|---|------------------------------------------------------------------------------------------------------------------------------------------------------------------------------------------------------------------------------------------------------------------------|-------------------------------------------------------------------------------------------------------------------------------------------------------------------------------|------------------------------|----------------------------------------------------------------------------|-------------------------------------------------------|--------------------------------------------|-----------------------------------------------------------------------------------------------|--------------------------------------------|
| Shannon | 0.59 | 44% | 1 | <b>Value 1;</b> Evidence of previous campaign activity: "have traditionally been low-around 5% in recent years. When vaccinations have been offered, hospital staff have frequently said, "The flu shot makes me sick," "I never get the flu," or "I don't trust it."" | <b>Value 1;</b> "While conducting annual infection control in-service education presentations in various departments, the infection control coordinator offered vaccinations" | <b>Value: 0;</b> No evidence | <b>Value 0;</b> Not stated                                                 | <b>Value 0;</b> No evidence of stigmatising processes | <b>Value 0;</b> Single hospital            | <b>Value 0;</b> Nothing stated                                                                | <b>Value 1:</b> Letter with data           |
| Smedley | 0.98 | 5%  | 0 | <b>Value 1;</b> vaccine offered routinely to employees since early 1990s - not promoted actively but                                                                                                                                                                   | <b>Value 1 ;</b> Intervention involved distribution of a leaflet describing effectiveness of                                                                                  | <b>Value: 0;</b> No evidence | <b>Value 1;</b> Intervention was targeted and responsive to staff concerns | <b>Value 0;</b> No evidence of stigmatising processes | <b>Value 0;</b> Single hospital trust unit | <b>Value 0;</b> discussion includes reference that gaining support of senior medical managers | <b>Value 0:</b> Research article published |

|                      |      |                                   |   |                                                                                        |                                                                                                            |                              |                                                                                 |                                                       |                                             |                                                                                                                                   |                                            |
|----------------------|------|-----------------------------------|---|----------------------------------------------------------------------------------------|------------------------------------------------------------------------------------------------------------|------------------------------|---------------------------------------------------------------------------------|-------------------------------------------------------|---------------------------------------------|-----------------------------------------------------------------------------------------------------------------------------------|--------------------------------------------|
|                      |      |                                   |   | promoted in advance of intervention                                                    | vaccine and a short presentation on influenza vaccine                                                      |                              |                                                                                 |                                                       |                                             | and clinical role models might improve vaccine uptake, although not described in present intervention                             |                                            |
| Thomas               | 0.59 | 54%                               | 1 | <b>Value 1;</b> An educational intervention began 1 month before vaccination available | <b>Value 1;</b> An educational intervention (no further description)                                       | <b>Value: 0;</b> No evidence | <b>Value 1;</b> Individual encouragement and answering of questions was offered | <b>Value 0;</b> No evidence of stigmatising processes | <b>Value 0;</b> Single care setting         | <b>Value 1;</b> A key element of programme involved immunising physicians in presence of other staff - including medical director | <b>Value 0;</b> Research article published |
| Zimmerman incentives | 0.97 | 38.4% (based on staff with direct | 0 | <b>Value 1;</b> Previous campaigns evaluated and used to plan                          | <b>Value 1;</b> Materials produced "that addressed myths about influenza, the vaccine, and motivations for | <b>Value: 0;</b> No evidence | <b>Value: 0;</b> No evidence                                                    | <b>Value 0;</b> No evidence of stigmatising processes | <b>Value: 0;</b> Eleven facilities included | <b>Value: 0;</b> No evidence                                                                                                      | <b>Value 0;</b> Research article published |



|                                    |      |                                                     |   |                                                                             |                                                                                                                                       |                       |                       |                                                |                                      |                       |                                     |
|------------------------------------|------|-----------------------------------------------------|---|-----------------------------------------------------------------------------|---------------------------------------------------------------------------------------------------------------------------------------|-----------------------|-----------------------|------------------------------------------------|--------------------------------------|-----------------------|-------------------------------------|
|                                    |      | patient contact )                                   |   | current intervention                                                        | choosing to be vaccinated or not"                                                                                                     |                       |                       |                                                |                                      |                       |                                     |
| Zimmerman increased access (carts) | 0.97 | 39.0% (based on staff with direct patient contact ) | 0 | Value 1; Previous campaigns evaluated and used to plan current intervention | Value 1; Materials produced "that addressed myths about influenza, the vaccine, and motivations for choosing to be vaccinated or not" | Value: 0; No evidence | Value: 0; No evidence | Value 0; No evidence of stigmatising processes | Value: 0; Eleven facilities included | Value: 0; No evidence | Value 0: Research article published |
